# Supplementary material for: No evidence of immune exhaustion after repeated SARS-CoV-2 vaccination in vulnerable and healthy populations
Source: Research Square preprint supplement (doi:10.21203/rs.3.rs-5485352/v1), 2024-11-27
Supplement: Supplementary file 1 [file 3f77db1a79705fe7492993ce.docx]

**Supplementary Information**


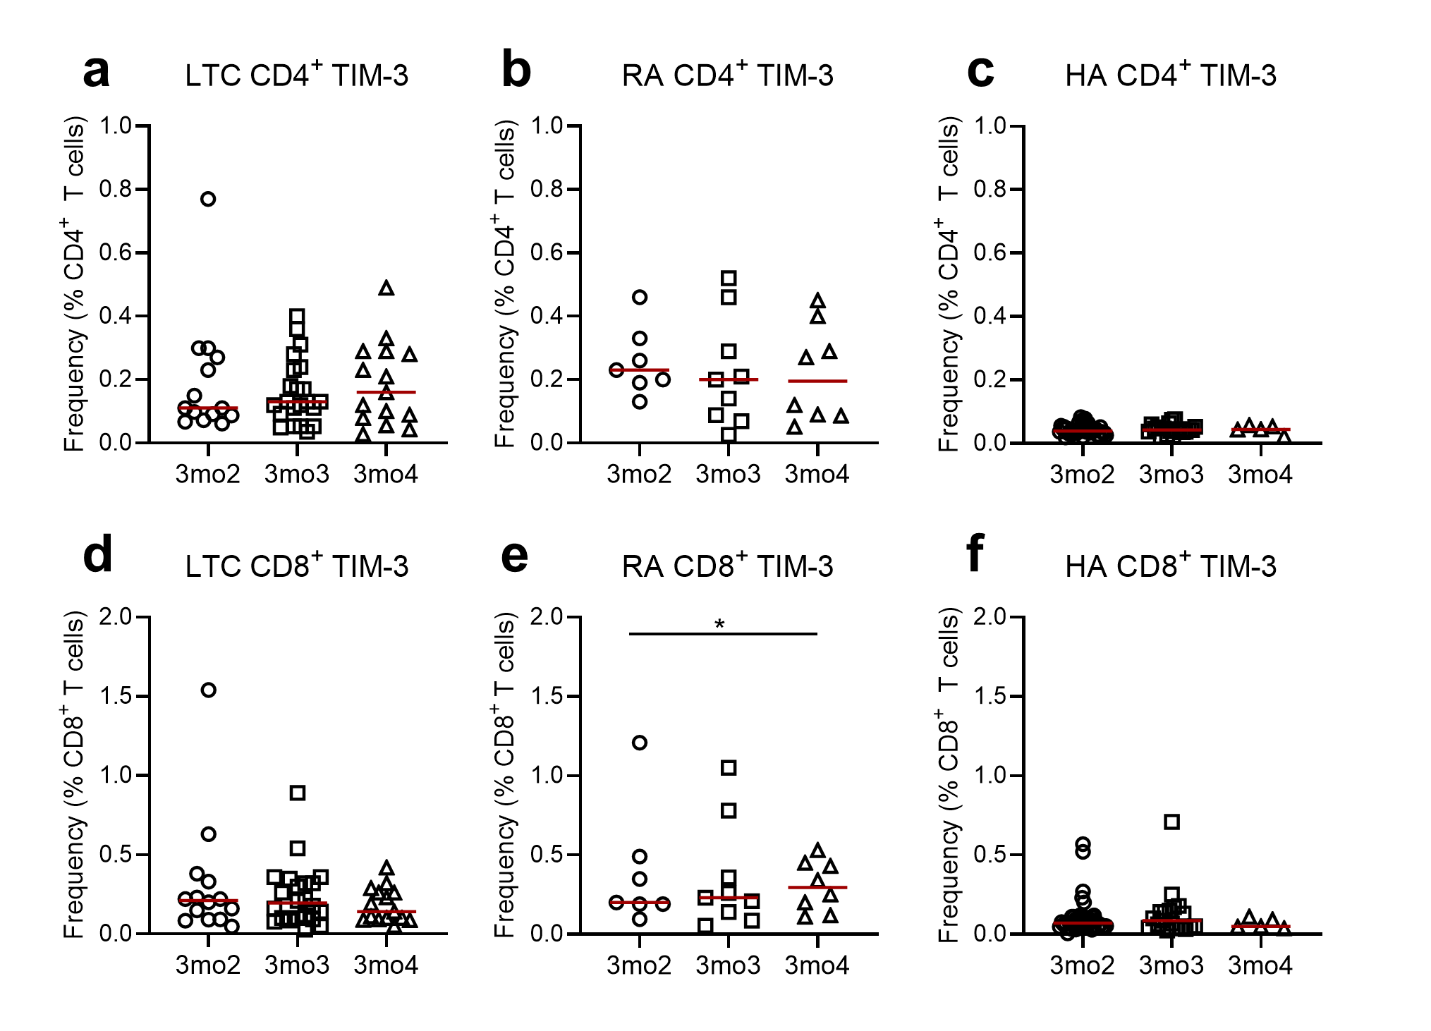


**Supplementary Figure 1. Frequencies of TIM-3+ T cells following repeated SARS-CoV-2 vaccination.** Flow cytometry was used to assess the frequencies of unstimulated CD4+ T cells expressing TIM-3 in each cohort (a-c), and the frequencies of CD8+ T cells expressing TIM-3 in each cohort (d-f). LTC: 3mo2 n=14, 3mo3 n=22, 3mo4 n=15. RA: 3mo2 n=7, 3mo3 n=9, 3mo4 n=8. HA: 3mo2 n=41, 3mo3 n=19, 3mo4 n=5. 3moX denotes 3 months post dose X. Multivariable linear mixed models accounting for age and sex were used to assess changes in the frequencies of each T cell subset within a given cohort following additional SARS-CoV-2 vaccinations. If not displayed, result was not significant. p<0.05 *.


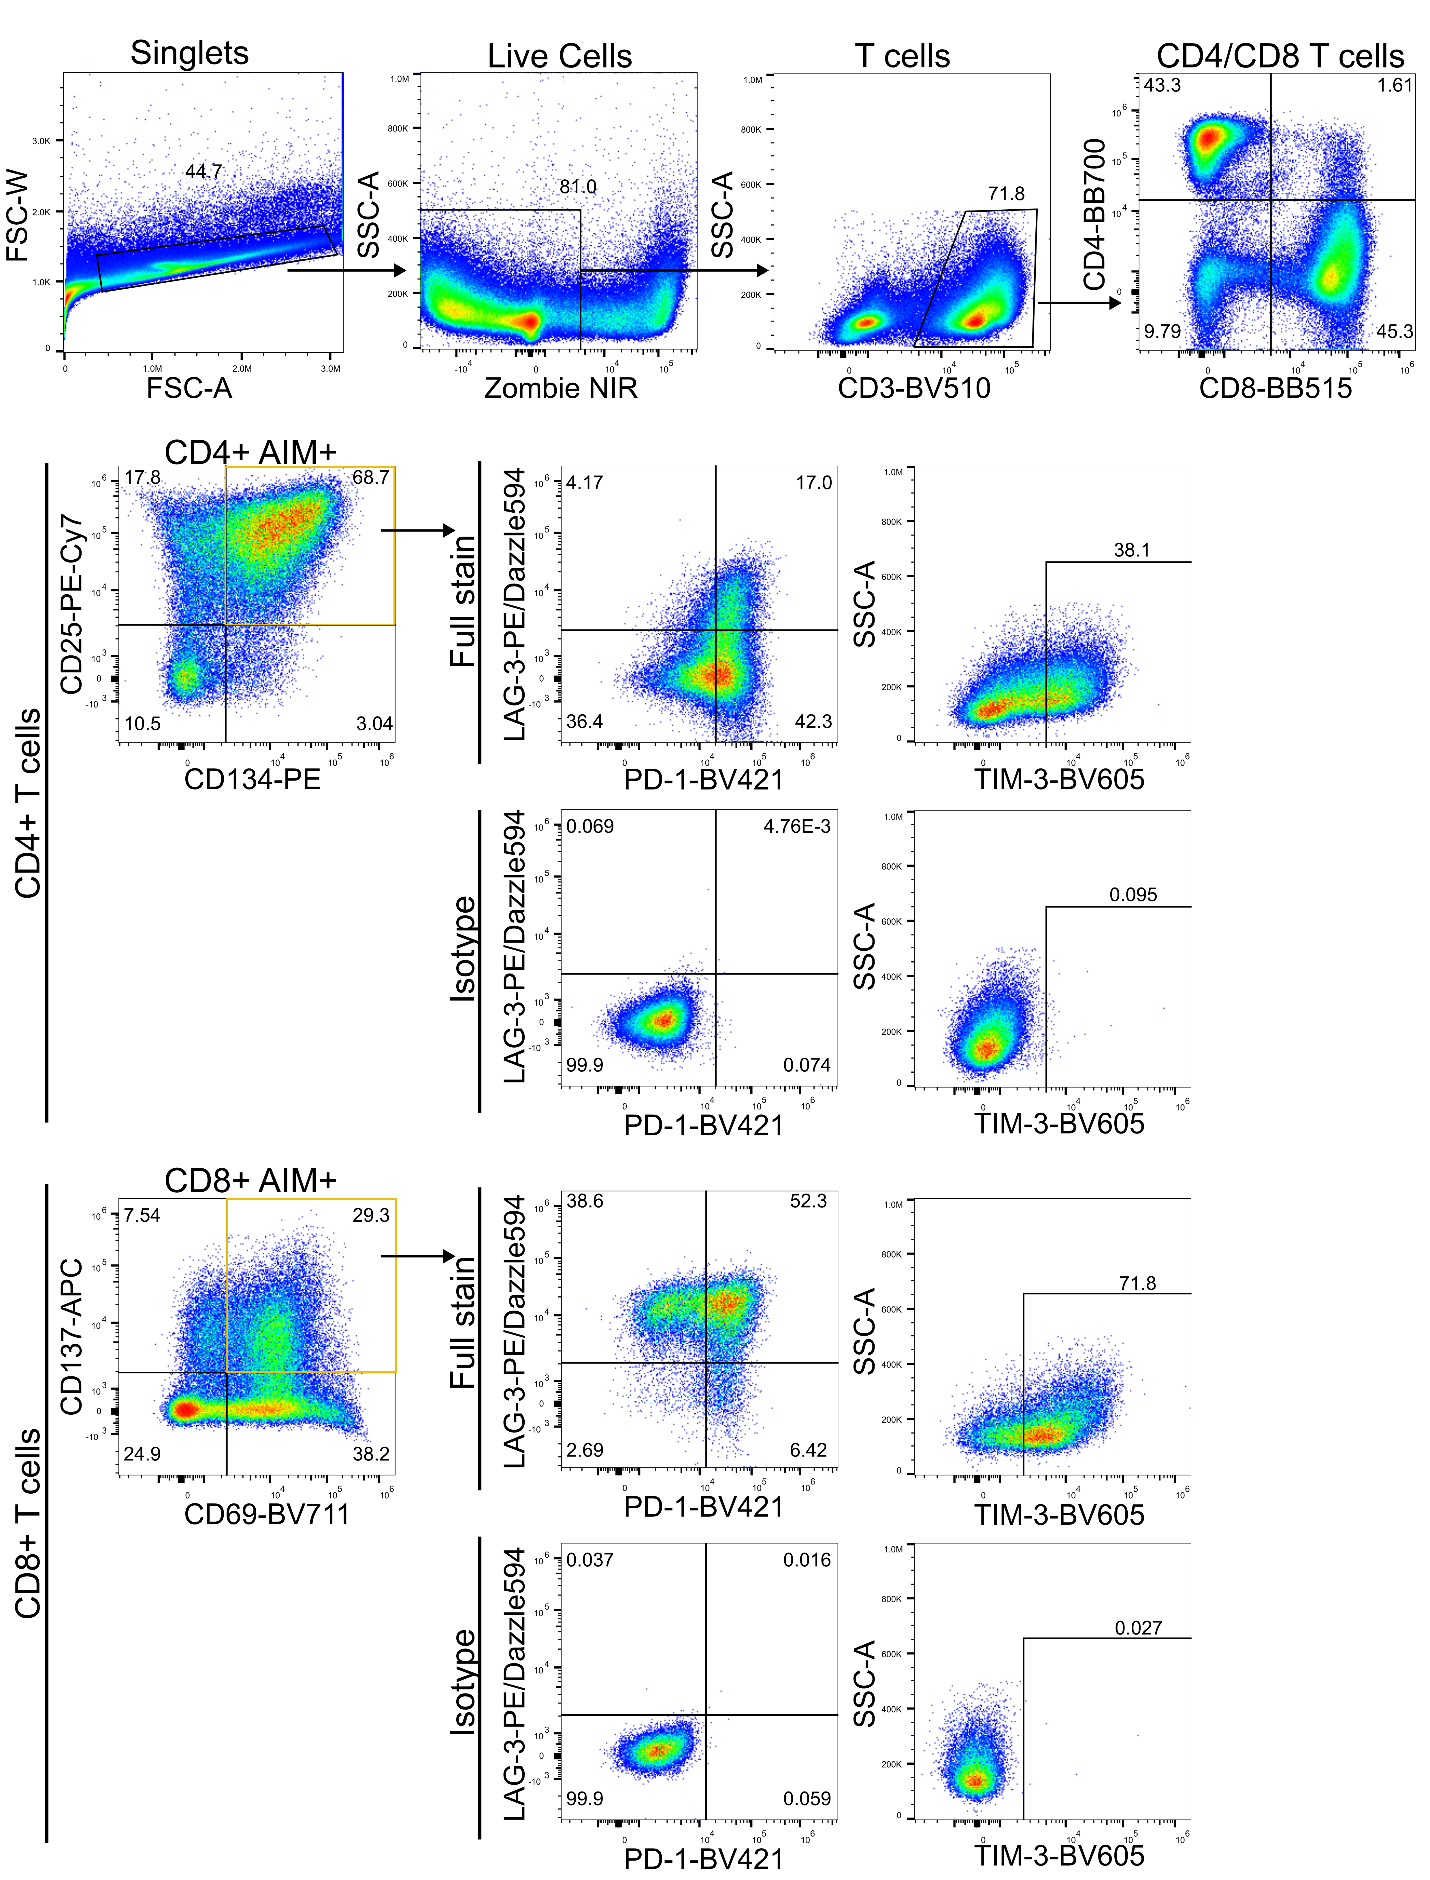


**Supplementary Figure 2. AIM assay gating strategy shown using Cytostim stimulation condition.** Doublets and debris were first excluded, followed by gating on live cells. T cells were then identified as CD3+ events. Within the T cell compartment, cells were divided into CD4+ or CD8+ single positive events. In the CD4+ T cell compartment, AIM+ cells (those responding to the stimulus) were detected as CD25+CD134+. In the CD8+ T cell compartment, AIM+ cells were detected as CD137+CD69+. The unstimulated well was used to help determine the position of this gate. Within the AIM+ CD4+ or CD8+ T cell compartment, quadrant gating for PD-1+LAG-3+, PD-1+LAG-3-, PD-1-LAG-3-, and PD-1-LAG-3+ events was conducted based on an isotype control (shown above). Each of these quadrants was then further gated into TIM-3+ and TIM-3- events based on an isotype control, to obtain each possible exhaustion marker combination.

**
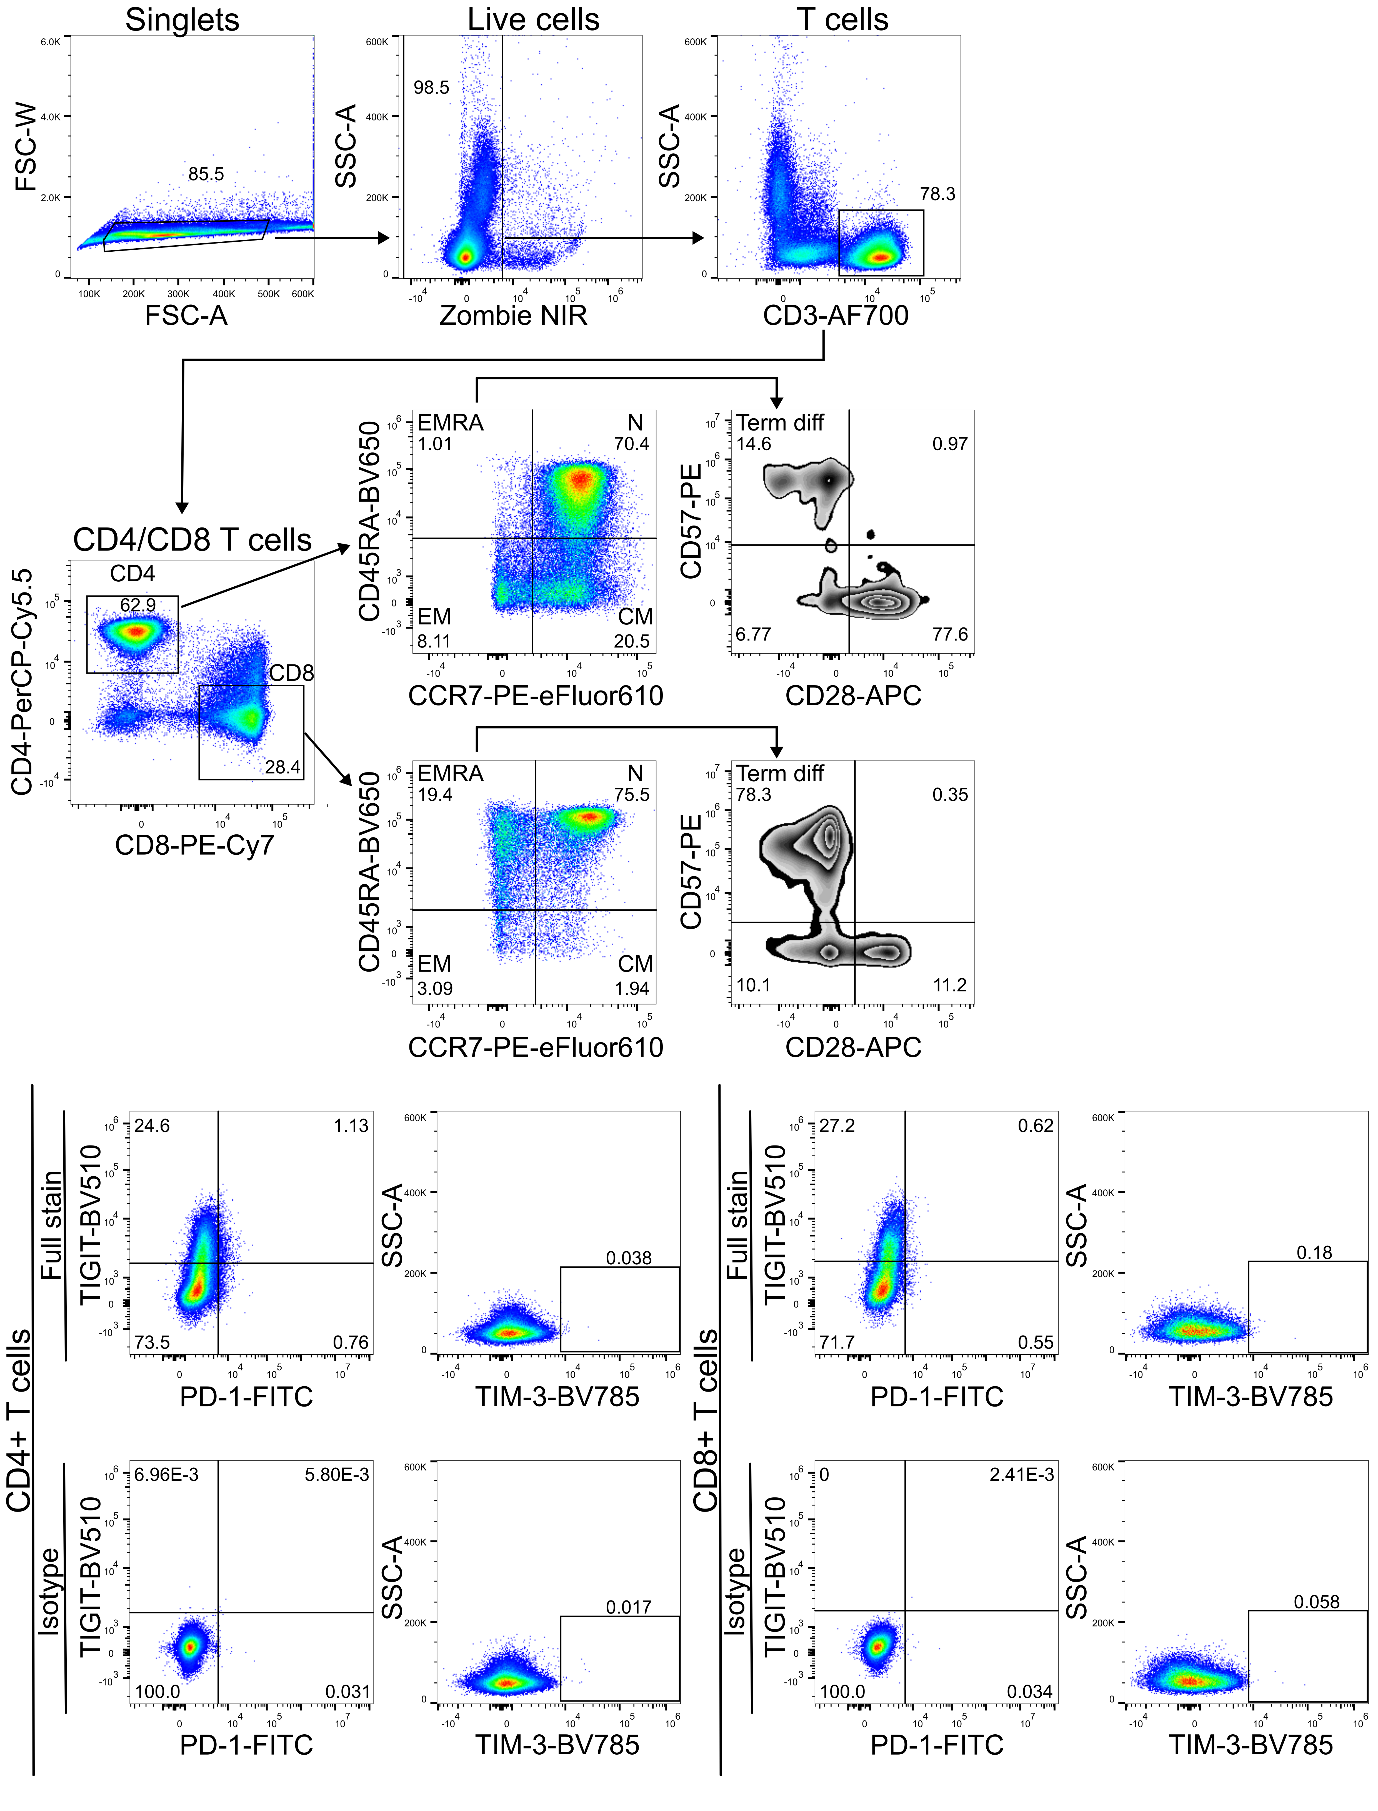
**

**Supplementary Figure 3. Surface immunophenotyping gating strategy.** Doublets and debris were first excluded, followed by gating on live cells. T cells were then detected as CD3+ events. T cells were divided into CD4+ or CD8+ single positive events. Within the CD4+ and within the CD8+ T cell compartments, naïve T cells were CCR7+CD45RA+, central memory were CCR7+CD45RA-, effector memory were CCR7-CD45RA-, and EM re-expressing CD45RA (EMRA) were CD45RA+CCR7-. Terminally differentiated cells were classified as EMRA+CD57+CD28-. CD4+ T cells, and CD8+ T cells, were also assessed for co-expression of PD-1 and TIGIT, and expression of TIM-3. Gates for each exhaustion marker were set using isotype controls (shown above).
