# Supplementary material for: No evidence of immune exhaustion after repeated SARS-CoV-2 vaccination in vulnerable and healthy populations
Source: Research Square preprint supplement (doi:10.21203/rs.3.rs-5485352/v1), 2024-11-27
Supplement: Supplementary file 2 [file c7677963baa1f910af44e30e.xlsx]

## Sheet: Supplementary Table 1
Immunosuppressive drug information for participants with RA
Participant ID	DMARDsa	TNF Inhibitorsb	JAK Inhibitorsc	Costimulation Inhibitors
RA-1	1	0	0	0
RA-2	1	1	0	0
RA-3	1	0	1	0
RA-4	0	0	1	0
RA-5	1	0	0	1
RA-6	0	1	0	0
RA-7	1	0	1	0
RA-8	1	0	1	0
RA-9	0	1	0	0
RA-10	1	0	1	0
aDMARDs- disease modifying anti-rheumatic drugs. Includes methotrexate, hydroxychloroquine, sulfasalazine, leflunomide, and prednisone.
bIncludes adalimumab and etanercept.
cIncludes tofacitinib and upadacitinib.
1 indicates the participant was taking the drug class during the study. 0 denotes participants who were not taking the drug class during the study.

## Sheet: Supplementary Table 2
Multivariable linear mixed model results for spike-specific T cell levels
Spike-Specific CD4+ T cells
Cohort	Subset	term	Estimate	SE	df	t	p
RA	Spike.Spec.CD4	Timept3mo3	0.256453	0.179578	11.293	1.42808	0.180334
RA	Spike.Spec.CD4	Timept3mo4	0.387865	0.193512	13.2444	2.00435	0.0659209
RA	Spike.Spec.CD4	SexMale	-0.415866	0.242044	4.54172	-1.71814	0.1523
RA	Spike.Spec.CD4	AgeScale	-0.496054	0.327695	4.67093	-1.51377	0.19453
HA	Spike.Spec.CD4	Timept3mo3	0.281853	0.174055	36.7984	1.61933	0.113916
HA	Spike.Spec.CD4	Timept3mo4	0.462611	0.278193	49.5764	1.66291	0.10264
HA	Spike.Spec.CD4	SexMale	0.134319	0.204425	42.2978	0.657057	0.514704
HA	Spike.Spec.CD4	AgeScale	-0.0131047	0.183689	37.5532	-0.0713414	0.943505
LTC	Spike.Spec.CD4	Timept3mo3	0.105638	0.0634426	31.0359	1.6651	0.105958
LTC	Spike.Spec.CD4	Timept3mo4	0.137981	0.0650169	30.7332	2.12223	0.0419834
LTC	Spike.Spec.CD4	SexMale	-0.0420837	0.199418	20.7911	-0.211032	0.834917
LTC	Spike.Spec.CD4	AgeScale	0.116331	0.147977	19.7836	0.786146	0.441097
Spike-Specific CD8+ T cells
Cohort	Subset	term	Estimate	SE	df	t	p
RA	Spike.Spec.CD8	Timept3mo3	0.0163379	0.162245	11.2826	0.100699	0.921557
RA	Spike.Spec.CD8	Timept3mo4	0.17026	0.180582	11.4827	0.94284	0.365178
RA	Spike.Spec.CD8	SexMale	0.688285	0.632021	7.01435	1.08902	0.312139
RA	Spike.Spec.CD8	AgeScale	-1.07143	0.855362	6.99766	-1.25261	0.250585
HA	Spike.Spec.CD8	Timept3mo3	0.00601482	0.16078	29.2414	0.0374103	0.970412
HA	Spike.Spec.CD8	Timept3mo4	0.424941	0.271446	35.9121	1.56547	0.126243
HA	Spike.Spec.CD8	SexMale	0.253268	0.269218	41.3364	0.940753	0.352297
HA	Spike.Spec.CD8	AgeScale	0.0423563	0.246896	38.5081	0.171556	0.864685
LTC	Spike.Spec.CD8	Timept3mo3	0.354943	0.116856	30.8252	3.03745	0.0048249
LTC	Spike.Spec.CD8	Timept3mo4	0.502756	0.119632	30.6407	4.20254	0.000211185
LTC	Spike.Spec.CD8	SexMale	0.211144	0.474608	20.7036	0.444881	0.661022
LTC	Spike.Spec.CD8	AgeScale	0.438803	0.354021	20.0783	1.23948	0.22946

## Sheet: Supplementary Table 3
Multivariable linear mixed model results for spike-specific T cell exhaustion markers
Spike-specific CD4+ T cell exhaustion markers
Cohort	Subset	term	Estimate	SE	df	t	p	q
RA	Spike.Spec.CD4.PD1negLAG3negTIM3neg	Timept3mo3	-0.00724651	0.0107902	11.0538	-0.671583	0.515639	0.731992
RA	Spike.Spec.CD4.PD1negLAG3negTIM3neg	Timept3mo4	-0.00672029	0.0120545	11.0878	-0.557492	0.58827	0.78436
RA	Spike.Spec.CD4.PD1negLAG3negTIM3neg	SexMale	0.119185	0.101336	7.00913	1.17614	0.277936	0.672758
RA	Spike.Spec.CD4.PD1negLAG3negTIM3neg	AgeScale	-0.129302	0.137221	7.00565	-0.942292	0.377393	0.710388
RA	Spike.Spec.CD4.PD1negLAG3posTIM3neg	Timept3mo3	0.201868	0.262614	12.0813	0.768688	0.456843	0.731992
RA	Spike.Spec.CD4.PD1negLAG3posTIM3neg	Timept3mo4	0.699221	0.290326	12.5707	2.4084	0.0321664	0.343109
RA	Spike.Spec.CD4.PD1negLAG3posTIM3neg	SexMale	-0.00941756	0.647423	7.40016	-0.0145462	0.988779	0.988779
RA	Spike.Spec.CD4.PD1negLAG3posTIM3neg	AgeScale	-0.0933035	0.875569	7.3751	-0.106563	0.917977	0.988779
RA	Spike.Spec.CD4.PD1posLAG3negTIM3neg	Timept3mo3	0.109617	0.109094	11.1096	1.00479	0.336379	0.672758
RA	Spike.Spec.CD4.PD1posLAG3negTIM3neg	Timept3mo4	0.129473	0.121718	11.2017	1.06372	0.30985	0.672758
RA	Spike.Spec.CD4.PD1posLAG3negTIM3neg	SexMale	-0.692879	0.624708	6.98795	-1.10913	0.304082	0.672758
RA	Spike.Spec.CD4.PD1posLAG3negTIM3neg	AgeScale	0.610271	0.845757	6.97916	0.721567	0.494019	0.731992
RA	Spike.Spec.CD4.PD1negLAG3negTIM3pos	Timept3mo3	-0.213528	0.183469	11.4307	-1.16384	0.268207	0.672758
RA	Spike.Spec.CD4.PD1negLAG3negTIM3pos	Timept3mo4	-0.39537	0.204352	11.5963	-1.93475	0.0777865	0.497834
RA	Spike.Spec.CD4.PD1negLAG3negTIM3pos	SexMale	0.588102	0.780069	7.21181	0.75391	0.474794	0.731992
RA	Spike.Spec.CD4.PD1negLAG3negTIM3pos	AgeScale	-0.802408	1.05583	7.19707	-0.759978	0.471425	0.731992
RA	Spike.Spec.CD4.PD1negLAG3posTIM3pos	Timept3mo3	-0.486637	0.249214	11.0889	-1.95269	0.0765547	0.497834
RA	Spike.Spec.CD4.PD1negLAG3posTIM3pos	Timept3mo4	-0.805487	0.277427	11.2835	-2.90342	0.0140171	0.343109
RA	Spike.Spec.CD4.PD1negLAG3posTIM3pos	SexMale	0.402181	0.989555	6.83002	0.406426	0.696862	0.857676
RA	Spike.Spec.CD4.PD1negLAG3posTIM3pos	AgeScale	0.676209	1.33927	6.81396	0.504909	0.629538	0.805809
RA	Spike.Spec.CD4.PD1posLAG3posTIM3neg	Timept3mo3	0.161075	0.706442	12.6781	0.228008	0.823276	0.940887
RA	Spike.Spec.CD4.PD1posLAG3posTIM3neg	Timept3mo4	1.00351	0.763025	14.2383	1.31518	0.209238	0.672758
RA	Spike.Spec.CD4.PD1posLAG3posTIM3neg	SexMale	-1.05395	0.985757	6.04918	-1.06918	0.325787	0.672758
RA	Spike.Spec.CD4.PD1posLAG3posTIM3neg	AgeScale	0.125056	1.33405	6.1709	0.0937415	0.928284	0.988779
RA	Spike.Spec.CD4.PD1posLAG3negTIM3pos	Timept3mo3	0.328426	0.301337	11.6291	1.0899	0.297828	0.672758
RA	Spike.Spec.CD4.PD1posLAG3negTIM3pos	Timept3mo4	0.564944	0.334434	11.9545	1.68925	0.117059	0.624315
RA	Spike.Spec.CD4.PD1posLAG3negTIM3pos	SexMale	-0.611539	0.91803	7.18636	-0.666143	0.526119	0.731992
RA	Spike.Spec.CD4.PD1posLAG3negTIM3pos	AgeScale	-0.0309699	1.242	7.16352	-0.0249355	0.980787	0.988779
RA	Spike.Spec.CD4.PD1posLAG3posTIM3pos	Timept3mo3	0.660451	0.488074	11.7227	1.35318	0.201519	0.672758
RA	Spike.Spec.CD4.PD1posLAG3posTIM3pos	Timept3mo4	1.36387	0.539241	12.2575	2.52924	0.0261004	0.343109
RA	Spike.Spec.CD4.PD1posLAG3posTIM3pos	SexMale	-1.66479	1.17111	6.97095	-1.42154	0.198316	0.672758
RA	Spike.Spec.CD4.PD1posLAG3posTIM3pos	AgeScale	-0.428543	1.58373	6.94676	-0.270592	0.794568	0.940887
HA	Spike.Spec.CD4.PD1negLAG3negTIM3neg	Timept3mo3	0.00226419	0.017046	26.23	0.132828	0.895343	0.955591
HA	Spike.Spec.CD4.PD1negLAG3negTIM3neg	Timept3mo4	-0.00322416	0.027242	40.8659	-0.118353	0.906368	0.955591
HA	Spike.Spec.CD4.PD1negLAG3negTIM3neg	SexMale	0.0136284	0.0200106	31.9943	0.681061	0.500733	0.84334
HA	Spike.Spec.CD4.PD1negLAG3negTIM3neg	AgeScale	0.040748	0.0179802	26.9667	2.26628	0.0316708	0.224966
HA	Spike.Spec.CD4.PD1negLAG3posTIM3neg	Timept3mo3	0.252916	0.158515	37.7677	1.59553	0.118928	0.422855
HA	Spike.Spec.CD4.PD1negLAG3posTIM3neg	Timept3mo4	0.0635703	0.251987	50.9338	0.252276	0.801843	0.955591
HA	Spike.Spec.CD4.PD1negLAG3posTIM3neg	SexMale	-0.182025	0.181376	42.4775	-1.00357	0.321266	0.685369
HA	Spike.Spec.CD4.PD1negLAG3posTIM3neg	AgeScale	-0.429307	0.16264	37.6188	-2.63961	0.0120116	0.192186
HA	Spike.Spec.CD4.PD1posLAG3negTIM3neg	Timept3mo3	-0.290384	0.132412	34.7026	-2.19304	0.035099	0.224966
HA	Spike.Spec.CD4.PD1posLAG3negTIM3neg	Timept3mo4	0.153195	0.211879	47.8794	0.723029	0.473179	0.84334
HA	Spike.Spec.CD4.PD1posLAG3negTIM3neg	SexMale	-0.0795878	0.156408	40.5091	-0.508847	0.61362	0.933777
HA	Spike.Spec.CD4.PD1posLAG3negTIM3neg	AgeScale	-0.0728062	0.140606	35.6656	-0.517805	0.607792	0.933777
HA	Spike.Spec.CD4.PD1negLAG3negTIM3pos	Timept3mo3	0.0682096	0.243955	30.9073	0.279599	0.781648	0.955591
HA	Spike.Spec.CD4.PD1negLAG3negTIM3pos	Timept3mo4	0.482594	0.391951	44.2382	1.23126	0.224731	0.581508
HA	Spike.Spec.CD4.PD1negLAG3negTIM3pos	SexMale	0.105609	0.294115	37.4392	0.359073	0.721558	0.955591
HA	Spike.Spec.CD4.PD1negLAG3negTIM3pos	AgeScale	-0.555673	0.26481	32.5667	-2.09838	0.0437115	0.224966
HA	Spike.Spec.CD4.PD1negLAG3posTIM3pos	Timept3mo3	0.363426	0.29905	23.6896	1.21527	0.236238	0.581508
HA	Spike.Spec.CD4.PD1negLAG3posTIM3pos	Timept3mo4	1.04571	0.500406	31.3439	2.08973	0.0448473	0.224966
HA	Spike.Spec.CD4.PD1negLAG3posTIM3pos	SexMale	0.0566299	0.464918	35.0011	0.121806	0.903749	0.955591
HA	Spike.Spec.CD4.PD1negLAG3posTIM3pos	AgeScale	-0.869345	0.425007	31.588	-2.04548	0.0492113	0.224966
HA	Spike.Spec.CD4.PD1posLAG3posTIM3neg	Timept3mo3	-0.0222421	0.213681	34.9051	-0.10409	0.917694	0.955591
HA	Spike.Spec.CD4.PD1posLAG3posTIM3neg	Timept3mo4	0.452802	0.341027	48.3904	1.32776	0.190487	0.581508
HA	Spike.Spec.CD4.PD1posLAG3posTIM3neg	SexMale	0.178282	0.249174	40.3453	0.715491	0.478426	0.84334
HA	Spike.Spec.CD4.PD1posLAG3posTIM3neg	AgeScale	-0.396356	0.223774	35.4249	-1.77124	0.0851252	0.340501
HA	Spike.Spec.CD4.PD1posLAG3negTIM3pos	Timept3mo3	-0.128179	0.273429	37.052	-0.468783	0.641972	0.933777
HA	Spike.Spec.CD4.PD1posLAG3negTIM3pos	Timept3mo4	0.535032	0.436237	49.9858	1.22647	0.225767	0.581508
HA	Spike.Spec.CD4.PD1posLAG3negTIM3pos	SexMale	0.00802738	0.318325	42.2958	0.0252176	0.98	0.98
HA	Spike.Spec.CD4.PD1posLAG3negTIM3pos	AgeScale	-0.20215	0.285839	37.5065	-0.707216	0.483804	0.84334
HA	Spike.Spec.CD4.PD1posLAG3posTIM3pos	Timept3mo3	0.300896	0.290166	30.638	1.03698	0.307861	0.685369
HA	Spike.Spec.CD4.PD1posLAG3posTIM3pos	Timept3mo4	0.0421344	0.449711	49.8672	0.093692	0.925729	0.955591
HA	Spike.Spec.CD4.PD1posLAG3posTIM3pos	SexMale	0.102037	0.297324	31.6872	0.343184	0.733727	0.955591
HA	Spike.Spec.CD4.PD1posLAG3posTIM3pos	AgeScale	-0.748291	0.264031	26.1194	-2.83411	0.00874766	0.192186
LTC	Spike.Spec.CD4.PD1negLAG3negTIM3neg	Timept3mo3	0.0391455	0.0278847	30.8591	1.40383	0.170352	0.555455
LTC	Spike.Spec.CD4.PD1negLAG3negTIM3neg	Timept3mo4	0.0335211	0.0285596	30.6238	1.17372	0.249553	0.555455
LTC	Spike.Spec.CD4.PD1negLAG3negTIM3neg	SexMale	-0.124333	0.099977	20.6876	-1.24362	0.227548	0.555455
LTC	Spike.Spec.CD4.PD1negLAG3negTIM3neg	AgeScale	-0.0196993	0.0744096	19.8977	-0.264741	0.793932	0.830626
LTC	Spike.Spec.CD4.PD1negLAG3posTIM3neg	Timept3mo3	-0.0851714	0.150682	31.649	-0.56524	0.575896	0.737147
LTC	Spike.Spec.CD4.PD1negLAG3posTIM3neg	Timept3mo4	0.0819102	0.155041	30.9141	0.528315	0.601053	0.739758
LTC	Spike.Spec.CD4.PD1negLAG3posTIM3neg	SexMale	0.258687	0.292545	20.6054	0.884265	0.386755	0.687141
LTC	Spike.Spec.CD4.PD1negLAG3posTIM3neg	AgeScale	0.121458	0.212827	18.3611	0.570688	0.57513	0.737147
LTC	Spike.Spec.CD4.PD1posLAG3negTIM3neg	Timept3mo3	0.0517032	0.0738764	30.4544	0.699861	0.489326	0.711747
LTC	Spike.Spec.CD4.PD1posLAG3negTIM3neg	Timept3mo4	0.131042	0.0756466	30.2449	1.73229	0.0934097	0.373639
LTC	Spike.Spec.CD4.PD1posLAG3negTIM3neg	SexMale	0.334115	0.282248	20.303	1.18376	0.250182	0.555455
LTC	Spike.Spec.CD4.PD1posLAG3negTIM3neg	AgeScale	0.445501	0.21032	19.6058	2.1182	0.0471392	0.351157
LTC	Spike.Spec.CD4.PD1negLAG3negTIM3pos	Timept3mo3	-0.50956	0.276864	32.2622	-1.84047	0.0749139	0.351157
LTC	Spike.Spec.CD4.PD1negLAG3negTIM3pos	Timept3mo4	-0.520524	0.284574	31.6477	-1.82914	0.0768157	0.351157
LTC	Spike.Spec.CD4.PD1negLAG3negTIM3pos	SexMale	-0.286683	0.589084	21.5212	-0.48666	0.631419	0.748348
LTC	Spike.Spec.CD4.PD1negLAG3negTIM3pos	AgeScale	0.107991	0.430769	19.5382	0.250692	0.804669	0.830626
LTC	Spike.Spec.CD4.PD1negLAG3posTIM3pos	Timept3mo3	-0.221914	0.264554	31.0086	-0.838821	0.40799	0.687141
LTC	Spike.Spec.CD4.PD1negLAG3posTIM3pos	Timept3mo4	-0.354953	0.271628	30.4949	-1.30676	0.201064	0.555455
LTC	Spike.Spec.CD4.PD1negLAG3posTIM3pos	SexMale	0.603406	0.629702	20.443	0.95824	0.349138	0.657201
LTC	Spike.Spec.CD4.PD1negLAG3posTIM3pos	AgeScale	0.347534	0.462918	18.8166	0.750747	0.462091	0.704139
LTC	Spike.Spec.CD4.PD1posLAG3posTIM3neg	Timept3mo3	0.31905	0.169299	33.5281	1.88453	0.0681869	0.351157
LTC	Spike.Spec.CD4.PD1posLAG3posTIM3neg	Timept3mo4	0.423064	0.174794	32.4964	2.42036	0.0212644	0.347402
LTC	Spike.Spec.CD4.PD1posLAG3posTIM3neg	SexMale	0.330851	0.261712	21.4953	1.26418	0.219703	0.555455
LTC	Spike.Spec.CD4.PD1posLAG3posTIM3neg	AgeScale	0.469608	0.18728	18.4277	2.50752	0.0217127	0.347402
LTC	Spike.Spec.CD4.PD1posLAG3negTIM3pos	Timept3mo3	-0.0285628	0.150997	31.748	-0.189162	0.85117	0.85117
LTC	Spike.Spec.CD4.PD1posLAG3negTIM3pos	Timept3mo4	0.0700628	0.155406	30.9869	0.450838	0.655245	0.748851
LTC	Spike.Spec.CD4.PD1posLAG3negTIM3pos	SexMale	-0.291162	0.28706	20.6358	-1.01429	0.322189	0.644379
LTC	Spike.Spec.CD4.PD1posLAG3negTIM3pos	AgeScale	0.413863	0.208567	18.3208	1.98432	0.0624055	0.351157
LTC	Spike.Spec.CD4.PD1posLAG3posTIM3pos	Timept3mo3	0.115946	0.202172	30.9677	0.573502	0.570447	0.737147
LTC	Spike.Spec.CD4.PD1posLAG3posTIM3pos	Timept3mo4	0.160152	0.207309	30.5988	0.772527	0.445729	0.704139
LTC	Spike.Spec.CD4.PD1posLAG3posTIM3pos	SexMale	-0.156503	0.573623	20.6339	-0.272833	0.787693	0.830626
LTC	Spike.Spec.CD4.PD1posLAG3posTIM3pos	AgeScale	0.492044	0.424418	19.4266	1.15934	0.26037	0.555455
Spike-specific CD8+ T cell exhaustion markers
RA	Spike.Spec.CD8.PD1negLAG3negTIM3neg	Timept3mo3	-0.170207	0.0553111	11.3923	-3.07726	0.0101312	0.248075
RA	Spike.Spec.CD8.PD1negLAG3negTIM3neg	Timept3mo4	-0.167579	0.0613491	11.7518	-2.73156	0.0185153	0.248075
RA	Spike.Spec.CD8.PD1negLAG3negTIM3neg	SexMale	0.470231	0.161991	6.90119	2.90282	0.023257	0.248075
RA	Spike.Spec.CD8.PD1negLAG3negTIM3neg	AgeScale	-0.585998	0.219143	6.8779	-2.67404	0.0323379	0.258703
RA	Spike.Spec.CD8.PD1negLAG3posTIM3neg	Timept3mo3	-0.898835	1.14028	13.1823	-0.788259	0.44449	0.677318
RA	Spike.Spec.CD8.PD1negLAG3posTIM3neg	Timept3mo4	0.862608	1.24846	14.02	0.690937	0.500886	0.696884
RA	Spike.Spec.CD8.PD1negLAG3posTIM3neg	SexMale	3.07714	2.0587	7.9166	1.4947	0.173743	0.472003
RA	Spike.Spec.CD8.PD1negLAG3posTIM3neg	AgeScale	-3.88134	2.78313	7.92002	-1.3946	0.201009	0.472003
RA	Spike.Spec.CD8.PD1posLAG3negTIM3neg	Timept3mo3	1.2871	0.742817	12.5411	1.73272	0.107644	0.394809
RA	Spike.Spec.CD8.PD1posLAG3negTIM3neg	Timept3mo4	0.916982	0.81246	13.5007	1.12865	0.278703	0.52244
RA	Spike.Spec.CD8.PD1posLAG3negTIM3neg	SexMale	0.322059	1.30915	7.06404	0.246007	0.812672	0.832567
RA	Spike.Spec.CD8.PD1posLAG3negTIM3neg	AgeScale	-0.538014	1.76984	7.0732	-0.30399	0.769884	0.821209
RA	Spike.Spec.CD8.PD1negLAG3negTIM3pos	Timept3mo3	-0.630177	1.06677	18	-0.590735	0.562043	0.719414
RA	Spike.Spec.CD8.PD1negLAG3negTIM3pos	Timept3mo4	-1.23653	1.14364	18	-1.08122	0.293872	0.52244
RA	Spike.Spec.CD8.PD1negLAG3negTIM3pos	SexMale	0.467265	1.3393	18	0.348888	0.731222	0.806865
RA	Spike.Spec.CD8.PD1negLAG3negTIM3pos	AgeScale	-0.389389	1.81532	18	-0.214502	0.832567	0.832567
RA	Spike.Spec.CD8.PD1negLAG3posTIM3pos	Timept3mo3	-1.56436	1.2037	18	-1.29963	0.210127	0.472003
RA	Spike.Spec.CD8.PD1negLAG3posTIM3pos	Timept3mo4	0.705419	1.29044	18	0.54665	0.591332	0.722093
RA	Spike.Spec.CD8.PD1negLAG3posTIM3pos	SexMale	-1.45116	1.51121	18	-0.96026	0.349647	0.588879
RA	Spike.Spec.CD8.PD1negLAG3posTIM3pos	AgeScale	-1.06554	2.04833	18	-0.520197	0.609266	0.722093
RA	Spike.Spec.CD8.PD1posLAG3posTIM3neg	Timept3mo3	1.6034	1.21793	13.4547	1.31649	0.209994	0.472003
RA	Spike.Spec.CD8.PD1posLAG3posTIM3neg	Timept3mo4	2.89194	1.33097	14.3371	2.17281	0.0470216	0.300938
RA	Spike.Spec.CD8.PD1posLAG3posTIM3neg	SexMale	-1.78842	2.10505	8.09885	-0.849587	0.419958	0.671933
RA	Spike.Spec.CD8.PD1posLAG3posTIM3neg	AgeScale	1.08149	2.84587	8.11392	0.38002	0.713685	0.806865
RA	Spike.Spec.CD8.PD1posLAG3negTIM3pos	Timept3mo3	2.06144	1.40464	18	1.46759	0.159472	0.472003
RA	Spike.Spec.CD8.PD1posLAG3negTIM3pos	Timept3mo4	0.918837	1.50586	18	0.610174	0.549373	0.719414
RA	Spike.Spec.CD8.PD1posLAG3negTIM3pos	SexMale	-2.12696	1.76349	18	-1.20611	0.243391	0.486782
RA	Spike.Spec.CD8.PD1posLAG3negTIM3pos	AgeScale	3.02884	2.39027	18	1.26715	0.221251	0.472003
RA	Spike.Spec.CD8.PD1posLAG3posTIM3pos	Timept3mo3	1.97109	1.14375	11.7361	1.72336	0.11104	0.394809
RA	Spike.Spec.CD8.PD1posLAG3posTIM3pos	Timept3mo4	2.37252	1.24975	12.8303	1.8984	0.0803665	0.36739
RA	Spike.Spec.CD8.PD1posLAG3posTIM3pos	SexMale	-4.51513	1.97139	6.1299	-2.29033	0.061001	0.325339
RA	Spike.Spec.CD8.PD1posLAG3posTIM3pos	AgeScale	2.02923	2.66518	6.14435	0.761387	0.474625	0.690364
HA	Spike.Spec.CD8.PD1negLAG3negTIM3neg	Timept3mo3	0.0314369	0.0639227	30.2958	0.491795	0.626409	0.795935
HA	Spike.Spec.CD8.PD1negLAG3negTIM3neg	Timept3mo4	-0.147596	0.105418	39.9776	-1.40011	0.169195	0.416479
HA	Spike.Spec.CD8.PD1negLAG3negTIM3neg	SexMale	0.161046	0.0895817	40.0523	1.79776	0.0797572	0.319029
HA	Spike.Spec.CD8.PD1negLAG3negTIM3neg	AgeScale	0.136809	0.0814553	36.1716	1.67956	0.101662	0.361464
HA	Spike.Spec.CD8.PD1negLAG3posTIM3neg	Timept3mo3	0.488215	0.248191	43.2859	1.9671	0.0556024	0.319029
HA	Spike.Spec.CD8.PD1negLAG3posTIM3neg	Timept3mo4	0.473149	0.382717	57.4182	1.23629	0.221385	0.506022
HA	Spike.Spec.CD8.PD1negLAG3posTIM3neg	SexMale	-0.00228496	0.249273	43.4731	-0.0091665	0.992728	0.992728
HA	Spike.Spec.CD8.PD1negLAG3posTIM3neg	AgeScale	-0.52742	0.220936	38.2391	-2.38721	0.0220238	0.23492
HA	Spike.Spec.CD8.PD1posLAG3negTIM3neg	Timept3mo3	-0.332196	0.180756	27.4501	-1.83782	0.0769356	0.319029
HA	Spike.Spec.CD8.PD1posLAG3negTIM3neg	Timept3mo4	0.439969	0.289762	41.5057	1.51838	0.1365	0.363999
HA	Spike.Spec.CD8.PD1posLAG3negTIM3neg	SexMale	-0.194092	0.215458	33.6867	-0.900832	0.374073	0.680931
HA	Spike.Spec.CD8.PD1posLAG3negTIM3neg	AgeScale	0.148287	0.193824	28.7118	0.765061	0.450479	0.758701
HA	Spike.Spec.CD8.PD1negLAG3negTIM3pos	Timept3mo3	-0.107129	0.231571	32.7411	-0.46262	0.646697	0.795935
HA	Spike.Spec.CD8.PD1negLAG3negTIM3pos	Timept3mo4	-0.0724879	0.377898	43.6119	-0.191819	0.848774	0.905359
HA	Spike.Spec.CD8.PD1negLAG3negTIM3pos	SexMale	-0.268114	0.304063	41.1424	-0.881771	0.383023	0.680931
HA	Spike.Spec.CD8.PD1negLAG3negTIM3pos	AgeScale	-0.313742	0.275393	36.9365	-1.13925	0.261934	0.523867
HA	Spike.Spec.CD8.PD1negLAG3posTIM3pos	Timept3mo3	-0.0194994	0.492883	33.3776	-0.0395619	0.968678	0.992728
HA	Spike.Spec.CD8.PD1negLAG3posTIM3pos	Timept3mo4	0.533996	0.782437	48.0047	0.682478	0.498217	0.773458
HA	Spike.Spec.CD8.PD1negLAG3posTIM3pos	SexMale	-0.374791	0.5603	38.1404	-0.66891	0.507582	0.773458
HA	Spike.Spec.CD8.PD1negLAG3posTIM3pos	AgeScale	-1.71447	0.502154	32.985	-3.41424	0.00171161	0.0547715
HA	Spike.Spec.CD8.PD1posLAG3posTIM3neg	Timept3mo3	-0.138204	0.25975	28.6395	-0.532065	0.598784	0.795935
HA	Spike.Spec.CD8.PD1posLAG3posTIM3neg	Timept3mo4	1.25319	0.434829	36.3919	2.88204	0.00659073	0.105452
HA	Spike.Spec.CD8.PD1posLAG3posTIM3neg	SexMale	0.202879	0.405168	40.0113	0.500729	0.619305	0.795935
HA	Spike.Spec.CD8.PD1posLAG3posTIM3neg	AgeScale	-0.151527	0.370443	36.7469	-0.409044	0.684882	0.801572
HA	Spike.Spec.CD8.PD1posLAG3negTIM3pos	Timept3mo3	-0.558116	0.36283	37.8916	-1.53823	0.132302	0.363999
HA	Spike.Spec.CD8.PD1posLAG3negTIM3pos	Timept3mo4	1.09623	0.580933	50.1308	1.88701	0.0649557	0.319029
HA	Spike.Spec.CD8.PD1posLAG3negTIM3pos	SexMale	-0.16593	0.429866	43.5157	-0.386003	0.701375	0.801572
HA	Spike.Spec.CD8.PD1posLAG3negTIM3pos	AgeScale	-0.81549	0.386524	38.9233	-2.1098	0.041357	0.319029
HA	Spike.Spec.CD8.PD1posLAG3posTIM3pos	Timept3mo3	0.156024	0.263041	35.9096	0.593154	0.556796	0.795935
HA	Spike.Spec.CD8.PD1posLAG3posTIM3pos	Timept3mo4	0.480488	0.422831	48.1859	1.13636	0.261426	0.523867
HA	Spike.Spec.CD8.PD1posLAG3posTIM3pos	SexMale	-0.0872416	0.317956	42.2162	-0.274382	0.785129	0.866349
HA	Spike.Spec.CD8.PD1posLAG3posTIM3pos	AgeScale	-0.448633	0.286332	37.6163	-1.56683	0.125529	0.363999
LTC	Spike.Spec.CD8.PD1negLAG3negTIM3neg	Timept3mo3	-0.116442	0.0501626	30.3736	-2.32129	0.0271619	0.177457
LTC	Spike.Spec.CD8.PD1negLAG3negTIM3neg	Timept3mo4	-0.134869	0.0513552	30.1854	-2.6262	0.0134317	0.143271
LTC	Spike.Spec.CD8.PD1negLAG3negTIM3neg	SexMale	-0.19831	0.202557	20.2418	-0.979033	0.339121	0.638345
LTC	Spike.Spec.CD8.PD1negLAG3negTIM3neg	AgeScale	-0.0539927	0.151078	19.6142	-0.357382	0.724622	0.810654
LTC	Spike.Spec.CD8.PD1negLAG3posTIM3neg	Timept3mo3	0.408213	0.637696	33.5708	0.640137	0.526429	0.749008
LTC	Spike.Spec.CD8.PD1negLAG3posTIM3neg	Timept3mo4	1.51788	0.658658	32.5033	2.30451	0.0277277	0.177457
LTC	Spike.Spec.CD8.PD1negLAG3posTIM3neg	SexMale	0.582396	0.964107	21.3829	0.604078	0.552147	0.749008
LTC	Spike.Spec.CD8.PD1negLAG3posTIM3neg	AgeScale	-0.354409	0.688588	18.2454	-0.514689	0.612949	0.784574
LTC	Spike.Spec.CD8.PD1posLAG3negTIM3neg	Timept3mo3	0.13407	0.120732	30.7747	1.11048	0.275394	0.638345
LTC	Spike.Spec.CD8.PD1posLAG3negTIM3neg	Timept3mo4	0.0503154	0.123604	30.5866	0.407071	0.686791	0.810654
LTC	Spike.Spec.CD8.PD1posLAG3negTIM3neg	SexMale	0.299189	0.485764	20.6486	0.615913	0.544682	0.749008
LTC	Spike.Spec.CD8.PD1posLAG3negTIM3neg	AgeScale	0.129108	0.362289	20.0127	0.356368	0.725295	0.810654
LTC	Spike.Spec.CD8.PD1negLAG3negTIM3pos	Timept3mo3	0.494962	0.503216	33.9137	0.983597	0.332279	0.638345
LTC	Spike.Spec.CD8.PD1negLAG3negTIM3pos	Timept3mo4	0.620537	0.519249	32.947	1.19507	0.240593	0.638345
LTC	Spike.Spec.CD8.PD1negLAG3negTIM3pos	SexMale	0.210999	0.804041	22.1466	0.262423	0.795421	0.848449
LTC	Spike.Spec.CD8.PD1negLAG3negTIM3pos	AgeScale	-0.847986	0.576949	19.1641	-1.46978	0.157849	0.561242
LTC	Spike.Spec.CD8.PD1negLAG3posTIM3pos	Timept3mo3	-0.124101	0.753746	34.8347	-0.164646	0.870175	0.895299
LTC	Spike.Spec.CD8.PD1negLAG3posTIM3pos	Timept3mo4	0.457119	0.780007	33.6461	0.586045	0.561756	0.749008
LTC	Spike.Spec.CD8.PD1negLAG3posTIM3pos	SexMale	1.12811	1.03414	21.9843	1.09087	0.287143	0.638345
LTC	Spike.Spec.CD8.PD1negLAG3posTIM3pos	AgeScale	0.444631	0.73197	18.5017	0.607444	0.55094	0.749008
LTC	Spike.Spec.CD8.PD1posLAG3posTIM3neg	Timept3mo3	2.39139	0.6015	36.3677	3.9757	0.000319686	0.00511497
LTC	Spike.Spec.CD8.PD1posLAG3posTIM3neg	Timept3mo4	2.52052	0.623415	35.1304	4.04309	0.000274243	0.00511497
LTC	Spike.Spec.CD8.PD1posLAG3posTIM3neg	SexMale	0.949439	0.769002	23.0647	1.23464	0.229396	0.638345
LTC	Spike.Spec.CD8.PD1posLAG3posTIM3neg	AgeScale	-0.0720591	0.540396	19.3281	-0.133345	0.895299	0.895299
LTC	Spike.Spec.CD8.PD1posLAG3negTIM3pos	Timept3mo3	0.460147	0.67185	39.4675	0.684895	0.497413	0.749008
LTC	Spike.Spec.CD8.PD1posLAG3negTIM3pos	Timept3mo4	1.39376	0.702754	37.9556	1.98328	0.0546055	0.249625
LTC	Spike.Spec.CD8.PD1posLAG3negTIM3pos	SexMale	0.616707	0.602271	21.036	1.02397	0.317482	0.638345
LTC	Spike.Spec.CD8.PD1posLAG3negTIM3pos	AgeScale	-0.529801	0.40584	17.1811	-1.30544	0.208954	0.638345
LTC	Spike.Spec.CD8.PD1posLAG3posTIM3pos	Timept3mo3	0.477581	0.291222	29.3201	1.63992	0.111708	0.446833
LTC	Spike.Spec.CD8.PD1posLAG3posTIM3pos	Timept3mo4	0.618378	0.298648	28.9309	2.07059	0.0474249	0.249625
LTC	Spike.Spec.CD8.PD1posLAG3posTIM3pos	SexMale	-0.631078	0.815005	18.974	-0.774324	0.448281	0.749008
LTC	Spike.Spec.CD8.PD1posLAG3posTIM3pos	AgeScale	0.207532	0.602753	17.7764	0.344307	0.734655	0.810654

## Sheet: Supplementary Table 4
Multivariable linear mixed model results for functionality and polyfunctionality
Spike-specific CD4+ T cell Functionality Scores
Cohort	Subset	term	Estimate	SE	df	t	p
RA	CD4.SPK.FS	Timept3mo3	0.0921208	0.0821724	12.5466	1.12107	0.283259
RA	CD4.SPK.FS	Timept3mo4	0.0953552	0.0862319	12.6729	1.1058	0.289364
RA	CD4.SPK.FS	SexMale	0.158361	0.289909	7.22661	0.546245	0.601348
RA	CD4.SPK.FS	AgeScale	-0.0106639	0.393105	7.26316	-0.0271274	0.979088
HA	CD4.SPK.FS	Timept3mo3	-0.0116105	0.0917757	24.2012	-0.126509	0.900374
HA	CD4.SPK.FS	Timept3mo4	0.138541	0.151964	33.6275	0.911671	0.368431
HA	CD4.SPK.FS	SexMale	0.0326602	0.129005	34.9515	0.253171	0.801619
HA	CD4.SPK.FS	AgeScale	-0.258572	0.116683	30.0687	-2.21602	0.0344016
LTC	CD4.SPK.FS	Timept3mo3	0.163433	0.192428	35.2039	0.849317	0.401444
LTC	CD4.SPK.FS	Timept3mo4	0.137538	0.198878	34.1385	0.691569	0.493885
LTC	CD4.SPK.FS	SexMale	-0.128668	0.281404	22.999	-0.457236	0.651791
LTC	CD4.SPK.FS	AgeScale	-0.229059	0.200389	19.6742	-1.14307	0.266728
Spike-specific CD4+ T cell Polyfunctionality Scores
RA	CD4.SPK.PFS	Timept3mo3	0.0261851	0.115673	12.4738	0.226373	0.824579
RA	CD4.SPK.PFS	Timept3mo4	0.194376	0.121479	12.5643	1.60008	0.134412
RA	CD4.SPK.PFS	SexMale	-0.0533633	0.482131	7.24708	-0.110682	0.914872
RA	CD4.SPK.PFS	AgeScale	0.379465	0.653512	7.27252	0.580655	0.579015
HA	CD4.SPK.PFS	Timept3mo3	0.14279	0.137419	22.2205	1.03909	0.309939
HA	CD4.SPK.PFS	Timept3mo4	0.0355724	0.21732	39.5255	0.163687	0.870812
HA	CD4.SPK.PFS	SexMale	0.0540354	0.151413	27.1003	0.356873	0.723951
HA	CD4.SPK.PFS	AgeScale	-0.30422	0.134103	20.9747	-2.26856	0.0339743
LTC	CD4.SPK.PFS	Timept3mo3	0.11019	0.206557	34.3195	0.533463	0.597151
LTC	CD4.SPK.PFS	Timept3mo4	0.168862	0.213004	33.4236	0.792766	0.433505
LTC	CD4.SPK.PFS	SexMale	-0.0305463	0.342891	22.8388	-0.0890845	0.929791
LTC	CD4.SPK.PFS	AgeScale	-0.288365	0.24679	19.9666	-1.16846	0.256382
Spike-specific CD8+ T cell Functionality Scores
RA	CD8.SPK.FS	Timept3mo3	-0.142173	0.383975	19	-0.370267	0.715279
RA	CD8.SPK.FS	Timept3mo4	-0.388988	0.395936	19	-0.982451	0.338224
RA	CD8.SPK.FS	SexMale	0.370943	0.474307	19	0.782074	0.443809
RA	CD8.SPK.FS	AgeScale	-0.511058	0.651839	19	-0.784025	0.442691
HA	CD8.SPK.FS	Timept3mo3	-0.0453057	0.127504	28.4343	-0.355329	0.724965
HA	CD8.SPK.FS	Timept3mo4	-0.11291	0.210735	38.2034	-0.535792	0.595208
HA	CD8.SPK.FS	SexMale	0.042713	0.17708	39.0281	0.241207	0.810658
HA	CD8.SPK.FS	AgeScale	-0.181851	0.160033	34.1567	-1.13633	0.263727
LTC	CD8.SPK.FS	Timept3mo3	0.142239	0.208248	35.7103	0.683027	0.498997
LTC	CD8.SPK.FS	Timept3mo4	0.129751	0.21604	34.3675	0.60059	0.552053
LTC	CD8.SPK.FS	SexMale	0.111948	0.255553	21.741	0.438061	0.665664
LTC	CD8.SPK.FS	AgeScale	-0.074468	0.178792	17.9777	-0.416505	0.681971
Spike-specific CD8+ T cell Polyfunctionality Scores
RA	CD8.SPK.PFS	Timept3mo3	-0.0810445	0.348136	19	-0.232795	0.81841
RA	CD8.SPK.PFS	Timept3mo4	-0.278582	0.358981	19	-0.776036	0.447281
RA	CD8.SPK.PFS	SexMale	0.121277	0.430037	19	0.282016	0.78098
RA	CD8.SPK.PFS	AgeScale	-0.364679	0.590999	19	-0.617055	0.544523
HA	CD8.SPK.PFS	Timept3mo3	-0.0291234	0.118611	31.5647	-0.245537	0.80763
HA	CD8.SPK.PFS	Timept3mo4	-0.0302231	0.19596	41.2193	-0.154231	0.87818
HA	CD8.SPK.PFS	SexMale	-0.0124096	0.164309	41.911	-0.0755257	0.940156
HA	CD8.SPK.PFS	AgeScale	-0.165439	0.148464	37.1972	-1.11434	0.272283
LTC	CD8.SPK.PFS	Timept3mo3	0.111545	0.185804	34.7882	0.600336	0.552174
LTC	CD8.SPK.PFS	Timept3mo4	0.130167	0.192308	33.5848	0.676866	0.503127
LTC	CD8.SPK.PFS	SexMale	0.187225	0.253051	21.8568	0.73987	0.467252
LTC	CD8.SPK.PFS	AgeScale	-0.07331	0.178982	18.3591	-0.409595	0.686843

## Sheet: Supplementary Table 5
Multivariable linear mixed model results for immunophenotyping of circulating CD4+ T cell compartment
CD4+ T cell subsets
Cohort	Subset	term	Estimate	SE	df	t	p	q
RA	CD4.CM	Timept3mo3	-0.103292	0.10853	12.4155	-0.951733	0.359394	0.612653
RA	CD4.CM	Timept3mo4	-0.0167403	0.113681	12.6344	-0.147257	0.885253	0.885253
RA	CD4.CM	SexMale	0.888566	0.293839	6.8499	3.02399	0.0197882	0.158306
RA	CD4.CM	AgeScale	-1.8283	0.398811	6.91515	-4.58439	0.00261126	0.0417801
RA	CD4.EM	Timept3mo3	-0.0472463	0.0903062	12.1139	-0.523179	0.610286	0.731568
RA	CD4.EM	Timept3mo4	0.0857785	0.0947773	12.239	0.905053	0.382908	0.612653
RA	CD4.EM	SexMale	0.531489	0.325001	6.79756	1.63534	0.147266	0.378612
RA	CD4.EM	AgeScale	-0.895045	0.440665	6.83167	-2.03112	0.0827746	0.378612
RA	CD4.EMRA	Timept3mo3	-0.0839507	0.14673	12.3938	-0.572143	0.577456	0.731568
RA	CD4.EMRA	Timept3mo4	0.097443	0.153944	12.5327	0.632978	0.538127	0.731568
RA	CD4.EMRA	SexMale	-0.187114	0.496755	7.03831	-0.376672	0.717516	0.76535
RA	CD4.EMRA	AgeScale	1.14032	0.673654	7.07795	1.69274	0.133866	0.378612
RA	CD4.N	Timept3mo3	-0.0244931	0.0510749	12.0633	-0.479553	0.640122	0.731568
RA	CD4.N	Timept3mo4	-0.0791678	0.0536667	12.1307	-1.47518	0.165643	0.378612
RA	CD4.N	SexMale	-0.335597	0.249871	6.89351	-1.34308	0.221779	0.443558
RA	CD4.N	AgeScale	0.642578	0.338609	6.91123	1.8977	0.10008	0.378612
HA	CD4.CM	Timept3mo3	0.00881788	0.0345612	22.3912	0.255138	0.800946	0.953012
HA	CD4.CM	Timept3mo4	0.0137684	0.0639558	22.6152	0.215281	0.831478	0.953012
HA	CD4.CM	SexMale	0.100784	0.0943826	38.8096	1.06783	0.292196	0.779189
HA	CD4.CM	AgeScale	0.200278	0.0929988	37.9491	2.15355	0.0376924	0.496871
HA	CD4.EM	Timept3mo3	-0.0801707	0.0565776	25.0968	-1.417	0.168777	0.540086
HA	CD4.EM	Timept3mo4	-0.148556	0.104345	25.8744	-1.4237	0.166481	0.540086
HA	CD4.EM	SexMale	-0.00655611	0.108077	39.4726	-0.0606614	0.951935	0.953012
HA	CD4.EM	AgeScale	0.0282697	0.105836	37.7169	0.26711	0.79084	0.953012
HA	CD4.EMRA	Timept3mo3	-0.118557	0.0685543	21.628	-1.72938	0.097989	0.522608
HA	CD4.EMRA	Timept3mo4	-0.0176241	0.126861	21.848	-0.138925	0.890782	0.953012
HA	CD4.EMRA	SexMale	-0.0111191	0.187462	38.0577	-0.059314	0.953012	0.953012
HA	CD4.EMRA	AgeScale	-0.355288	0.184717	37.1869	-1.92342	0.0621089	0.496871
HA	CD4.N	Timept3mo3	0.0360278	0.0373203	21.3401	0.965367	0.345174	0.78897
HA	CD4.N	Timept3mo4	0.0597182	0.0690521	21.5779	0.864828	0.396646	0.793293
HA	CD4.N	SexMale	-0.0261804	0.0993206	37.6695	-0.263595	0.793529	0.953012
HA	CD4.N	AgeScale	-0.063126	0.0978346	36.7429	-0.645232	0.522786	0.929397
LTC	CD4.CM	Timept3mo3	-0.0643922	0.0668607	28.0053	-0.96308	0.34375	0.6875
LTC	CD4.CM	Timept3mo4	0.0217273	0.0706945	27.53	0.307341	0.760897	0.848997
LTC	CD4.CM	SexMale	0.0816128	0.188762	21.079	0.432358	0.669872	0.824458
LTC	CD4.CM	AgeScale	-0.0994033	0.139765	19.9015	-0.711219	0.485202	0.705748
LTC	CD4.EM	Timept3mo3	0.116502	0.0317921	26.4544	3.66451	0.00109241	0.00873925
LTC	CD4.EM	Timept3mo4	0.105417	0.0335186	26.2506	3.14501	0.0040982	0.0195237
LTC	CD4.EM	SexMale	0.142077	0.142137	20.0929	0.999582	0.329399	0.6875
LTC	CD4.EM	AgeScale	0.0278461	0.10622	19.6099	0.262156	0.795935	0.848997
LTC	CD4.EMRA	Timept3mo3	0.0606512	0.0777744	26.3946	0.779835	0.442425	0.705748
LTC	CD4.EMRA	Timept3mo4	0.0487543	0.082087	26.0822	0.593934	0.557673	0.743564
LTC	CD4.EMRA	SexMale	0.278472	0.27859	19.8187	0.999575	0.329565	0.6875
LTC	CD4.EMRA	AgeScale	0.172142	0.207479	19.0793	0.829681	0.41698	0.705748
LTC	CD4.N	Timept3mo3	-0.111873	0.0284783	26.189	-3.92835	0.000557751	0.00873925
LTC	CD4.N	Timept3mo4	-0.09221	0.0299832	26.1265	-3.07539	0.00488093	0.0195237
LTC	CD4.N	SexMale	-0.462507	0.232586	20.0834	-1.98854	0.0605515	0.193765
LTC	CD4.N	AgeScale	0.0109254	0.174565	19.9363	0.0625864	0.950719	0.950719
Terminally Differentiated CD4+ T cells
RA	CD4.Tsen	Timept3mo3	-0.245868	0.188874	12.0873	-1.30176	0.217262	NA
RA	CD4.Tsen	Timept3mo4	-0.401245	0.198583	12.124	-2.02054	0.0659826	NA
RA	CD4.Tsen	SexMale	1.28715	1.24749	6.99465	1.03179	0.33652	NA
RA	CD4.Tsen	AgeScale	-1.71755	1.69004	7.00419	-1.01628	0.343308	NA
HA	CD4.Tsen	Timept3mo3	-0.0853726	0.0967233	21.2817	-0.882647	0.387289	NA
HA	CD4.Tsen	Timept3mo4	0.0806863	0.179267	21.3141	0.450089	0.657191	NA
HA	CD4.Tsen	SexMale	0.00166958	0.541428	38.9314	0.00308365	0.997555	NA
HA	CD4.Tsen	AgeScale	-1.19437	0.535768	38.7307	-2.22926	0.0316691	NA
LTC	CD4.Tsen	Timept3mo3	0.131943	0.198528	26.525	0.664607	0.512039	NA
LTC	CD4.Tsen	Timept3mo4	0.143167	0.209322	26.3155	0.683953	0.499984	NA
LTC	CD4.Tsen	SexMale	1.10964	0.874675	20.1529	1.26863	0.219032	NA
LTC	CD4.Tsen	AgeScale	0.594442	0.653531	19.6554	0.909585	0.374061	NA
Overall CD4+ T cell exhaustion marker expression
RA	CD4.PD1neg.TIGITpos	Timept3mo3	-0.242121	0.260714	12.6897	-0.928684	0.370382	0.493842
RA	CD4.PD1neg.TIGITpos	Timept3mo4	-0.499793	0.273264	12.8727	-1.82897	0.0906571	0.373641
RA	CD4.PD1neg.TIGITpos	SexMale	1.06402	0.762641	7.22	1.39518	0.204375	0.430062
RA	CD4.PD1neg.TIGITpos	AgeScale	-1.82845	1.03474	7.27572	-1.76706	0.118933	0.380585
RA	CD4.PD1pos.TIGITpos	Timept3mo3	-0.0448699	0.206122	12.8445	-0.217686	0.831094	0.854691
RA	CD4.PD1pos.TIGITpos	Timept3mo4	-0.15581	0.215795	13.0808	-0.72203	0.482984	0.594442
RA	CD4.PD1pos.TIGITpos	SexMale	1.17916	0.528589	7.23036	2.23076	0.0597072	0.373641
RA	CD4.PD1pos.TIGITpos	AgeScale	-1.67365	0.717622	7.30616	-2.33222	0.050944	0.373641
RA	CD4.PD1pos.TIGITneg	Timept3mo3	-0.092632	0.181869	12.705	-0.509334	0.619249	0.707713
RA	CD4.PD1pos.TIGITneg	Timept3mo4	-0.0355828	0.190452	12.9316	-0.186833	0.854691	0.854691
RA	CD4.PD1pos.TIGITneg	SexMale	0.650586	0.478903	7.11628	1.35849	0.215797	0.430062
RA	CD4.PD1pos.TIGITneg	AgeScale	-0.828979	0.650076	7.18704	-1.2752	0.24191	0.430062
RA	CD4.PD1neg.TIGITneg	Timept3mo3	0.0418208	0.0372995	14.5335	1.12121	0.280381	0.44861
RA	CD4.PD1neg.TIGITneg	Timept3mo4	0.0692936	0.0386967	15.0987	1.79069	0.0934103	0.373641
RA	CD4.PD1neg.TIGITneg	SexMale	-0.0779574	0.0561882	7.85402	-1.38743	0.203405	0.430062
RA	CD4.PD1neg.TIGITneg	AgeScale	0.0794397	0.0767584	8.16122	1.03493	0.330391	0.480568
HA	CD4.PD1neg.TIGITpos	Timept3mo3	0.120928	0.139038	60	0.869749	0.387904	0.847825
HA	CD4.PD1neg.TIGITpos	Timept3mo4	0.455109	0.241132	60	1.88738	0.0639483	0.511587
HA	CD4.PD1neg.TIGITpos	SexMale	0.0886505	0.130245	60	0.680646	0.498714	0.847825
HA	CD4.PD1neg.TIGITpos	AgeScale	-0.0581593	0.122207	60	-0.475907	0.635869	0.847825
HA	CD4.PD1pos.TIGITpos	Timept3mo3	-0.0303396	0.0628794	22.4797	-0.482505	0.634113	0.847825
HA	CD4.PD1pos.TIGITpos	Timept3mo4	0.0122734	0.11621	22.8901	0.105614	0.916809	0.977929
HA	CD4.PD1pos.TIGITpos	SexMale	0.0536849	0.142432	38.0944	0.376916	0.708328	0.871788
HA	CD4.PD1pos.TIGITpos	AgeScale	-0.143857	0.139974	36.8177	-1.02775	0.310775	0.847825
HA	CD4.PD1pos.TIGITneg	Timept3mo3	-0.149193	0.0917217	22.2809	-1.62659	0.117886	0.522028
HA	CD4.PD1pos.TIGITneg	Timept3mo4	-0.0411995	0.169551	22.6573	-0.242992	0.810198	0.92594
HA	CD4.PD1pos.TIGITneg	SexMale	-0.00154121	0.212947	38.0255	-0.00723756	0.994263	0.994263
HA	CD4.PD1pos.TIGITneg	AgeScale	-0.323799	0.209357	36.8098	-1.54663	0.130507	0.522028
HA	CD4.PD1neg.TIGITneg	Timept3mo3	-0.0111693	0.0158898	60	-0.702922	0.484823	0.847825
HA	CD4.PD1neg.TIGITneg	Timept3mo4	-0.0599695	0.0275575	60	-2.17616	0.0334911	0.511587
HA	CD4.PD1neg.TIGITneg	SexMale	-0.0111938	0.0148849	60	-0.752029	0.454974	0.847825
HA	CD4.PD1neg.TIGITneg	AgeScale	0.00789564	0.0139663	60	0.565335	0.573954	0.847825
LTC	CD4.PD1neg.TIGITpos	Timept3mo3	0.0659192	0.0885472	28.2011	0.744452	0.462762	0.925523
LTC	CD4.PD1neg.TIGITpos	Timept3mo4	0.100864	0.0938399	27.5181	1.07485	0.291777	0.900077
LTC	CD4.PD1neg.TIGITpos	SexMale	0.172022	0.203423	20.7241	0.845639	0.407412	0.925523
LTC	CD4.PD1neg.TIGITpos	AgeScale	-0.0749483	0.149454	19.0167	-0.50148	0.621789	0.939507
LTC	CD4.PD1pos.TIGITpos	Timept3mo3	0.0553979	0.105688	26.5551	0.524165	0.604512	0.939507
LTC	CD4.PD1pos.TIGITpos	Timept3mo4	0.0231819	0.111772	26.0482	0.207403	0.837308	0.939507
LTC	CD4.PD1pos.TIGITpos	SexMale	0.0990904	0.291676	19.5483	0.339728	0.737684	0.939507
LTC	CD4.PD1pos.TIGITpos	AgeScale	-0.380994	0.215811	18.3435	-1.76541	0.0941366	0.568045
LTC	CD4.PD1pos.TIGITneg	Timept3mo3	0.215536	0.124779	26.4784	1.72735	0.0957546	0.568045
LTC	CD4.PD1pos.TIGITneg	Timept3mo4	0.0192414	0.131863	26.043	0.14592	0.885108	0.939507
LTC	CD4.PD1pos.TIGITneg	SexMale	0.0648279	0.374325	19.6379	0.173186	0.864278	0.939507
LTC	CD4.PD1pos.TIGITneg	AgeScale	-0.40669	0.277647	18.6052	-1.46477	0.159677	0.638707
LTC	CD4.PD1neg.TIGITneg	Timept3mo3	-0.010037	0.00600113	25.7975	-1.67252	0.106508	0.568045
LTC	CD4.PD1neg.TIGITneg	Timept3mo4	0.000484938	0.00632758	25.5836	0.0766388	0.939507	0.939507
LTC	CD4.PD1neg.TIGITneg	SexMale	-0.00950643	0.0262747	19.4209	-0.361809	0.721402	0.939507
LTC	CD4.PD1neg.TIGITneg	AgeScale	0.0193161	0.0196301	18.9223	0.984005	0.337529	0.900077

## Sheet: Supplementary Table 6
Multivariable linear mixed model results for TIM-3
CD4+ T cell TIM-3
Cohort	Subset	term	Estimate	SE	df	t	p
RA	CD4.TIM3.Freq	Timept3mo3	-0.154927	0.154692	12.1599	-1.00152	0.33609
RA	CD4.TIM3.Freq	Timept3mo4	-0.161208	0.162545	12.2261	-0.991777	0.34053
RA	CD4.TIM3.Freq	SexMale	-0.368277	0.760798	6.99223	-0.484068	0.643131
RA	CD4.TIM3.Freq	AgeScale	0.557832	1.03098	7.00986	0.541072	0.605218
HA	CD4.TIM3.Freq	Timept3mo3	0.00151496	0.068988	33.7562	0.0219598	0.982609
HA	CD4.TIM3.Freq	Timept3mo4	0.0568048	0.123948	40.8011	0.458294	0.649173
HA	CD4.TIM3.Freq	SexMale	-0.123531	0.0786133	38.1597	-1.57138	0.124351
HA	CD4.TIM3.Freq	AgeScale	-0.0727182	0.0751278	33.6307	-0.967928	0.33999
LTC	CD4.TIM3.Freq	Timept3mo3	0.0724547	0.117534	26.8199	0.616456	0.542791
LTC	CD4.TIM3.Freq	Timept3mo4	0.0508978	0.124321	26.2991	0.409408	0.685556
LTC	CD4.TIM3.Freq	SexMale	-0.241322	0.318966	19.7768	-0.756576	0.458223
LTC	CD4.TIM3.Freq	AgeScale	-0.113281	0.235874	18.5297	-0.480259	0.636664
CD8+ T cell TIM-3
RA	CD8.TIM3.Freq	Timept3mo3	-0.299022	0.169676	12.1259	-1.7623	0.103183
RA	CD8.TIM3.Freq	Timept3mo4	-0.46786	0.178163	12.227	-2.62602	0.0218481
RA	CD8.TIM3.Freq	SexMale	1.05031	0.678012	6.87009	1.54911	0.166089
RA	CD8.TIM3.Freq	AgeScale	-0.313822	0.919095	6.89736	-0.341447	0.742933
HA	CD8.TIM3.Freq	Timept3mo3	0.0713632	0.085918	23.2275	0.830596	0.414658
HA	CD8.TIM3.Freq	Timept3mo4	-0.0617593	0.158757	23.6732	-0.389017	0.700741
HA	CD8.TIM3.Freq	SexMale	-0.466753	0.19063	38.7118	-2.44848	0.0189823
HA	CD8.TIM3.Freq	AgeScale	-0.500504	0.187271	37.3955	-2.67262	0.0110876
LTC	CD8.TIM3.Freq	Timept3mo3	0.00590636	0.146346	28.2763	0.0403588	0.968091
LTC	CD8.TIM3.Freq	Timept3mo4	-0.121478	0.155508	27.3681	-0.78117	0.441408
LTC	CD8.TIM3.Freq	SexMale	-0.123718	0.282155	20.0563	-0.438476	0.665728
LTC	CD8.TIM3.Freq	AgeScale	-0.484666	0.205336	17.7737	-2.36036	0.0299015

## Sheet: Supplementary Table 7
Multivariable linear mixed model results for immunophenotyping of circulating CD8+ T cell compartment
CD8+ T cell subsets
Cohort	Subset	term	Estimate	SE	df	t	p	q
RA	CD8.CM	Timept3mo3	-0.294429	0.219951	12.9301	-1.33861	0.203759	0.407518
RA	CD8.CM	Timept3mo4	-0.260902	0.230394	13.1394	-1.13242	0.277701	0.493691
RA	CD8.CM	SexMale	1.32333	0.596335	7.39453	2.21911	0.0599486	0.269054
RA	CD8.CM	AgeScale	-2.38879	0.809365	7.46156	-2.95143	0.0198698	0.269054
RA	CD8.EM	Timept3mo3	0.0134098	0.110616	12.1063	0.121228	0.905499	0.96257
RA	CD8.EM	Timept3mo4	0.0918315	0.116199	12.1862	0.790294	0.444463	0.646492
RA	CD8.EM	SexMale	1.07697	0.496559	6.90419	2.16887	0.0672636	0.269054
RA	CD8.EM	AgeScale	-1.10326	0.672986	6.92547	-1.63935	0.145611	0.388295
RA	CD8.EMRA	Timept3mo3	-0.0104929	0.0604876	12.0997	-0.173472	0.865149	0.96257
RA	CD8.EMRA	Timept3mo4	0.103085	0.0635846	12.1458	1.62122	0.130625	0.388295
RA	CD8.EMRA	SexMale	0.113502	0.3567	6.98331	0.318199	0.759638	0.93494
RA	CD8.EMRA	AgeScale	0.272565	0.48328	6.99535	0.563991	0.590376	0.787167
RA	CD8.N	Timept3mo3	-0.0932247	0.110238	12.0202	-0.845667	0.414256	0.646492
RA	CD8.N	Timept3mo4	-0.23877	0.115914	12.0531	-2.05989	0.0616819	0.269054
RA	CD8.N	SexMale	-1.08559	0.770617	6.9375	-1.40873	0.202121	0.407518
RA	CD8.N	AgeScale	0.0507854	1.04395	6.94595	0.0486472	0.96257	0.96257
HA	CD8.CM	Timept3mo3	0.0716172	0.0811369	22.6984	0.882671	0.386667	0.644252
HA	CD8.CM	Timept3mo4	0.1696	0.149504	23.6094	1.13442	0.268006	0.583449
HA	CD8.CM	SexMale	-0.0122043	0.147352	36.7084	-0.0828246	0.934441	0.941165
HA	CD8.CM	AgeScale	0.478456	0.144103	34.6712	3.32025	0.00212498	0.00991774
HA	CD8.EM	Timept3mo3	-0.00884697	0.0613769	23.5352	-0.144142	0.886616	0.941165
HA	CD8.EM	Timept3mo4	-0.0302305	0.112933	24.7224	-0.267685	0.791163	0.941165
HA	CD8.EM	SexMale	0.00776324	0.104471	36.8652	0.0743102	0.941165	0.941165
HA	CD8.EM	AgeScale	0.511539	0.101968	34.5542	5.01667	1.57258e-05	0.000251613
HA	CD8.EMRA	Timept3mo3	-0.106056	0.031056	22.0127	-3.41499	0.00247944	0.00991774
HA	CD8.EMRA	Timept3mo4	0.0412861	0.05752	22.1217	0.717769	0.480411	0.69878
HA	CD8.EMRA	SexMale	0.115765	0.108314	39.0742	1.06879	0.291724	0.583449
HA	CD8.EMRA	AgeScale	0.309238	0.10696	38.5538	2.89114	0.00627518	0.0200806
HA	CD8.N	Timept3mo3	0.0683791	0.0440333	22.1313	1.5529	0.134633	0.35902
HA	CD8.N	Timept3mo4	-0.0493589	0.0814784	22.3634	-0.605791	0.550753	0.734338
HA	CD8.N	SexMale	-0.100447	0.1187	38.5097	-0.846221	0.402657	0.644252
HA	CD8.N	AgeScale	-0.409905	0.116942	37.6208	-3.50519	0.00119704	0.00957635
LTC	CD8.CM	Timept3mo3	-0.0458183	0.088266	26.6763	-0.519094	0.607975	0.810634
LTC	CD8.CM	Timept3mo4	-0.0931999	0.0930405	26.4937	-1.00171	0.325544	0.578745
LTC	CD8.CM	SexMale	0.0558925	0.417026	20.3563	0.134026	0.894698	0.938905
LTC	CD8.CM	AgeScale	-0.545365	0.311847	19.9213	-1.74882	0.0957151	0.306288
LTC	CD8.EM	Timept3mo3	0.0439881	0.0843848	27.1226	0.52128	0.606402	0.810634
LTC	CD8.EM	Timept3mo4	0.0920739	0.0890743	26.8019	1.03368	0.310526	0.578745
LTC	CD8.EM	SexMale	0.379764	0.296509	20.5314	1.28078	0.214549	0.490398
LTC	CD8.EM	AgeScale	-0.185401	0.220742	19.7575	-0.839899	0.411014	0.657622
LTC	CD8.EMRA	Timept3mo3	0.00484829	0.0310047	26.522	0.156373	0.876923	0.938905
LTC	CD8.EMRA	Timept3mo4	0.0589801	0.0326712	26.3721	1.80526	0.0824635	0.306288
LTC	CD8.EMRA	SexMale	-0.0125868	0.162195	20.2618	-0.0776029	0.938905	0.938905
LTC	CD8.EMRA	AgeScale	0.280289	0.121411	19.906	2.30861	0.031829	0.169755
LTC	CD8.N	Timept3mo3	-0.0916041	0.0649243	26.7953	-1.41094	0.169768	0.452716
LTC	CD8.N	Timept3mo4	-0.221798	0.0684479	26.5958	-3.2404	0.00320013	0.051202
LTC	CD8.N	SexMale	-0.0632063	0.292777	20.444	-0.215885	0.831216	0.938905
LTC	CD8.N	AgeScale	-0.52429	0.218817	19.9671	-2.39602	0.0264872	0.169755
Terminally Differentiated CD8+ T cells
RA	CD8.Tsen	Timept3mo3	0.0588289	0.133148	12.0903	0.441831	0.666411	NA
RA	CD8.Tsen	Timept3mo4	0.180306	0.140018	12.1181	1.28773	0.221888	NA
RA	CD8.Tsen	SexMale	0.788753	1.0108	7.02037	0.780324	0.460696	NA
RA	CD8.Tsen	AgeScale	0.341162	1.36927	7.02754	0.249157	0.810365	NA
HA	CD8.Tsen	Timept3mo3	-0.0979165	0.0604815	21.5584	-1.61895	0.119996	NA
HA	CD8.Tsen	Timept3mo4	0.0938061	0.112066	21.6199	0.837063	0.411715	NA
HA	CD8.Tsen	SexMale	0.431132	0.261011	38.9594	1.65177	0.106619	NA
HA	CD8.Tsen	AgeScale	0.68807	0.258053	38.6205	2.66639	0.0111383	NA
LTC	CD8.Tsen	Timept3mo3	-0.0228214	0.0555175	26.2397	-0.411067	0.684362	NA
LTC	CD8.Tsen	Timept3mo4	0.114563	0.0584506	26.1785	1.95999	0.0607224	NA
LTC	CD8.Tsen	SexMale	0.167021	0.458001	20.1365	0.364674	0.719156	NA
LTC	CD8.Tsen	AgeScale	0.682847	0.343761	19.9922	1.9864	0.0608699	NA
Overall CD8+ T cell exhaustion marker expression
RA	CD8.PD1neg.TIGITpos	Timept3mo3	0.166711	0.123877	12.1848	1.34578	0.202882	0.46373
RA	CD8.PD1neg.TIGITpos	Timept3mo4	0.0858911	0.13013	12.264	0.66004	0.521432	0.595922
RA	CD8.PD1neg.TIGITpos	SexMale	1.03913	0.557022	6.98384	1.86551	0.10446	0.46373
RA	CD8.PD1neg.TIGITpos	AgeScale	-0.739156	0.754929	7.00514	-0.979106	0.360123	0.480164
RA	CD8.PD1pos.TIGITpos	Timept3mo3	-0.367212	0.238607	12.4268	-1.53898	0.148875	0.46373
RA	CD8.PD1pos.TIGITpos	Timept3mo4	-0.250077	0.250541	12.5258	-0.998147	0.337101	0.480164
RA	CD8.PD1pos.TIGITpos	SexMale	1.75047	0.953368	7.1767	1.83609	0.107925	0.46373
RA	CD8.PD1pos.TIGITpos	AgeScale	-2.12344	1.29236	7.20447	-1.64307	0.143152	0.46373
RA	CD8.PD1pos.TIGITneg	Timept3mo3	-0.208145	0.168976	12.6673	-1.2318	0.240402	0.463889
RA	CD8.PD1pos.TIGITneg	Timept3mo4	-0.0864	0.17725	12.8124	-0.487446	0.634176	0.634176
RA	CD8.PD1pos.TIGITneg	SexMale	1.04305	0.554331	7.30019	1.88163	0.100193	0.46373
RA	CD8.PD1pos.TIGITneg	AgeScale	-0.807436	0.751804	7.34333	-1.074	0.316843	0.480164
RA	CD8.PD1neg.TIGITneg	Timept3mo3	0.0278165	0.0331043	12.2227	0.840269	0.416892	0.513098
RA	CD8.PD1neg.TIGITneg	Timept3mo4	0.0409951	0.0347871	12.2852	1.17846	0.260938	0.463889
RA	CD8.PD1neg.TIGITneg	SexMale	-0.251901	0.167143	7.06458	-1.5071	0.175127	0.46373
RA	CD8.PD1neg.TIGITneg	AgeScale	0.120532	0.226492	7.08133	0.532169	0.610891	0.634176
HA	CD8.PD1neg.TIGITpos	Timept3mo3	0.0885296	0.124363	60	0.711865	0.479307	0.589917
HA	CD8.PD1neg.TIGITpos	Timept3mo4	0.423475	0.215681	60	1.96344	0.054235	0.214893
HA	CD8.PD1neg.TIGITpos	SexMale	-0.100574	0.116498	60	-0.863311	0.391405	0.569316
HA	CD8.PD1neg.TIGITpos	AgeScale	0.1223	0.109308	60	1.11885	0.267662	0.428259
HA	CD8.PD1pos.TIGITpos	Timept3mo3	-0.149457	0.0791367	23.243	-1.8886	0.071489	0.214893
HA	CD8.PD1pos.TIGITpos	Timept3mo4	0.0722563	0.146445	23.4683	0.493403	0.626314	0.668068
HA	CD8.PD1pos.TIGITpos	SexMale	0.298316	0.216713	39.6372	1.37654	0.17638	0.313564
HA	CD8.PD1pos.TIGITpos	AgeScale	0.383128	0.213543	38.7966	1.79415	0.080585	0.214893
HA	CD8.PD1pos.TIGITneg	Timept3mo3	-0.11432	0.0679502	22.779	-1.68241	0.106149	0.215693
HA	CD8.PD1pos.TIGITneg	Timept3mo4	0.0676019	0.12581	22.9327	0.537333	0.596213	0.668068
HA	CD8.PD1pos.TIGITneg	SexMale	0.501758	0.210949	39.5575	2.37857	0.0223	0.1784
HA	CD8.PD1pos.TIGITneg	AgeScale	0.756391	0.208124	38.9053	3.63433	0.000804764	0.0128762
HA	CD8.PD1neg.TIGITneg	Timept3mo3	-0.00637978	0.015932	60	-0.400437	0.690257	0.690257
HA	CD8.PD1neg.TIGITneg	Timept3mo4	-0.0580052	0.0276307	60	-2.0993	0.0400057	0.213363
HA	CD8.PD1neg.TIGITneg	SexMale	-0.0108567	0.0149244	60	-0.727443	0.469784	0.589917
HA	CD8.PD1neg.TIGITneg	AgeScale	-0.0228583	0.0140034	60	-1.63234	0.107847	0.215693
LTC	CD8.PD1neg.TIGITpos	Timept3mo3	0.142022	0.0833218	28.1874	1.7045	0.0992882	0.847471
LTC	CD8.PD1neg.TIGITpos	Timept3mo4	0.0897385	0.0882044	27.6037	1.01739	0.317802	0.847471
LTC	CD8.PD1neg.TIGITpos	SexMale	0.226851	0.209504	20.9883	1.0828	0.291179	0.847471
LTC	CD8.PD1neg.TIGITpos	AgeScale	0.114566	0.154506	19.532	0.741502	0.467212	0.955525
LTC	CD8.PD1pos.TIGITpos	Timept3mo3	0.0220409	0.176413	26.772	0.12494	0.901505	0.987154
LTC	CD8.PD1pos.TIGITpos	Timept3mo4	0.0650969	0.18705	26.0283	0.348018	0.730625	0.987154
LTC	CD8.PD1pos.TIGITpos	SexMale	0.0295223	0.390758	19.1355	0.0755512	0.94056	0.987154
LTC	CD8.PD1pos.TIGITpos	AgeScale	-0.329265	0.286593	17.3586	-1.14889	0.266185	0.847471
LTC	CD8.PD1pos.TIGITneg	Timept3mo3	-0.014102	0.128094	25.8985	-0.110091	0.913186	0.987154
LTC	CD8.PD1pos.TIGITneg	Timept3mo4	-0.0202873	0.13528	25.5231	-0.149965	0.881971	0.987154
LTC	CD8.PD1pos.TIGITneg	SexMale	0.227114	0.417601	19.1977	0.543854	0.592802	0.987154
LTC	CD8.PD1pos.TIGITneg	AgeScale	-0.372139	0.310392	18.3211	-1.19893	0.245832	0.847471
LTC	CD8.PD1neg.TIGITneg	Timept3mo3	-0.0128372	0.017821	25.916	-0.720341	0.477762	0.955525
LTC	CD8.PD1neg.TIGITneg	Timept3mo4	-0.00806716	0.0188378	25.4522	-0.428244	0.672076	0.987154
LTC	CD8.PD1neg.TIGITneg	SexMale	-0.0570726	0.051845	19.0217	-1.10083	0.284706	0.847471
LTC	CD8.PD1neg.TIGITneg	AgeScale	0.000627302	0.0384217	17.9388	0.0163268	0.987154	0.987154

## Sheet: Supplementary Table 8
HA cohort dosing interval demographics
	Rec	Del	Ext	P value
Sample size	21	7	14	N/A
Age, median ± SD	47.0 ± 10.4	49.0 ± 13.2	46.5 ± 7.2	0.9547a
Sex, % female (n)	61.9 (13)	71.4 (5)	50.0 (7)	0.7041b
Days between dose 1 and dose 2 (median ± SD)	21.0 ± 1.5	39.0 ± 0.38	82.5 ± 14.0	<0.0001a
Second dose vaccine type	21 BNT162b2	7 BNT162b2	12 BNT162b2 2 mRNA-1273	0.1301b
aOne-way ANOVA
bFisher’s exact test
All HA participants received BNT162b2 as their first vaccine.

## Sheet: Supplementary Table 9
Statistical test information for comparison of HA dosing intervals
Spike-specific T cells
Parameter	Groups being compared	Test	p	q
Spike-specific CD4+ T cells	Rec vs Del vs Ext	Brown-Forsythe ANOVA test	0.065	NA
Spike-specific CD8+ T cells	Rec vs Del vs Ext	Ordinary one-way ANOVA	0.136	NA
Spike-specific CD4+ T cell exhaustion markers
Parameter	Groups being compared	Test	p	q
PD1- LAG3- TIM3-	Rec vs Del vs Ext	Kruskal-Wallis test	0.6702	0.9829
PD1- LAG3+ TIM3-	Rec vs Del vs Ext	Kruskal-Wallis test	0.975	0.9829
PD1+ LAG3- TIM3-	Rec vs Del vs Ext	Kruskal-Wallis test	0.2205	0.898
PD1- LAG3- TIM3+	Rec vs Del vs Ext	Kruskal-Wallis test	0.7389	0.9829
PD1- LAG3+ TIM3+	Rec vs Del vs Ext	Kruskal-Wallis test	0.3508	0.9355
PD1+ LAG3+ TIM3-	Rec vs Del vs Ext	Kruskal-Wallis test	0.9371	0.9829
PD1+ LAG3- TIM3+	Rec vs Del vs Ext	Kruskal-Wallis test	0.9829	0.9829
PD1+ LAG3+ TIM3+	Rec vs Del vs Ext	Kruskal-Wallis test	0.2245	0.898
Spike-specific CD8+ T cell exhaustion markers
Parameter	Groups being compared	Test	p	q
PD1- LAG3- TIM3-	Rec vs Del vs Ext	Kruskal-Wallis test	0.8791	0.7988
PD1- LAG3+ TIM3-	Rec vs Del vs Ext	Kruskal-Wallis test	0.3814	0.6982
PD1+ LAG3- TIM3-	Rec vs Del vs Ext	Kruskal-Wallis test	0.1326	0.6982
PD1- LAG3- TIM3+	Rec vs Del vs Ext	Kruskal-Wallis test	0.2273	0.6982
PD1- LAG3+ TIM3+	Rec vs Del vs Ext	Kruskal-Wallis test	0.4254	0.7038
PD1+ LAG3+ TIM3-	Rec vs Del vs Ext	Kruskal-Wallis test	0.7485	0.7988
PD1+ LAG3- TIM3+	Rec vs Del vs Ext	Kruskal-Wallis test	0.4592	0.6982
PD1+ LAG3+ TIM3+	Rec vs Del vs Ext	Kruskal-Wallis test	0.7469	0.7988
CD4+ T cell COMPASS
Parameter	Groups being compared	Test	p	q
CD4+ T cell FS	Rec vs Del vs Ext	Kruskal-Wallis test	0.4847	NA
CD4+ T cell PFS	Rec vs Del vs Ext	Kruskal-Wallis test	0.3534	NA
CD8+ T cell COMPASS
Parameter	Groups being compared	Test	p	q
CD8+ T cell FS	Rec vs Del vs Ext	Brown-Forsythe ANOVA test	0.0214	NA
CD8+ T cell FS	Rec vs. Del	Post hoc: Dunnett T3	0.4063	NA
CD8+ T cell FS	Rec vs. Ext	Post hoc: Dunnett T3	0.033	NA
CD8+ T cell FS	Del vs. Ext	Post hoc: Dunnett T3	0.7342	NA
CD8+ T cell PFS	Rec vs Del vs Ext	Ordinary one-way ANOVA	0.0119	NA
CD8+ T cell PFS	Rec vs. Del	Post hoc:Tukey's multiple comparisons test	0.2424	NA
CD8+ T cell PFS	Rec vs. Ext	Post hoc:Tukey's multiple comparisons test	0.0103	NA
CD8+ T cell PFS	Del vs. Ext	Post hoc:Tukey's multiple comparisons test	0.7237	NA
CD4+ T cell subsets
Parameter	Groups being compared	Test	p	q
CD4 CM	Rec vs Del vs Ext	Kruskal-Wallis test	0.2844	0.3792
CD4 EM	Rec vs Del vs Ext	Kruskal-Wallis test	0.2484	0.3792
CD4 EMRA	Rec vs Del vs Ext	Kruskal-Wallis test	0.7456	0.7456
CD4 N	Rec vs Del vs Ext	Kruskal-Wallis test	0.1966	0.3792
CD8+ T cell subsets
Parameter	Groups being compared	Test	p	q
CD8 CM	Rec vs Del vs Ext	Kruskal-Wallis test	0.3338	0.4451
CD8 EM	Rec vs Del vs Ext	Kruskal-Wallis test	0.5516	0.5516
CD8 EMRA	Rec vs Del vs Ext	Kruskal-Wallis test	0.2305	0.4451
CD8 N	Rec vs Del vs Ext	Kruskal-Wallis test	0.1583	0.445
Terminally differentiated cells
Parameter	Groups being compared	Test	p	q
CD4 terminally differentiated	Rec vs Del vs Ext	Kruskal-Wallis test	0.7751	NA
CD8 terminally differentiated	Rec vs Del vs Ext	Kruskal-Wallis test	0.4944	NA
Overall CD4+ T cell exhaustion markers
Parameter	Groups being compared	Test	p	q
PD1-TIGIT+	Rec vs Del vs Ext	Kruskal-Wallis test	0.3433	0.4018
PD1+TIGIT+	Rec vs Del vs Ext	Kruskal-Wallis test	0.1682	0.4018
PD1+TIGIT-	Rec vs Del vs Ext	Kruskal-Wallis test	0.4018	0.4018
PD1-TIGIT-	Rec vs Del vs Ext	Kruskal-Wallis test	0.3789	0.4018
Overall CD8+ T cell exhaustion markers
Parameter	Groups being compared	Test	p	q
PD1-TIGIT+	Rec vs Del vs Ext	Kruskal-Wallis test	0.32	0.32
PD1+TIGIT+	Rec vs Del vs Ext	Kruskal-Wallis test	0.0106	0.0424
PD1+TIGIT+	Rec vs. Del	Post hoc:Dunn's multiple comparisons test	0.0228	NA
PD1+TIGIT+	Rec vs. Ext	Post hoc:Dunn's multiple comparisons test	>0.9999	NA
PD1+TIGIT+	Del vs. Ext	Post hoc:Dunn's multiple comparisons test	0.0122	NA
PD1+TIGIT-	Rec vs Del vs Ext	Kruskal-Wallis test	0.25	0.32
PD1-TIGIT-	Rec vs Del vs Ext	Kruskal-Wallis test	0.0811	0.1622

## Sheet: Supplementary Table 10
Flow cytometry antibody staining cocktails
Panel	Specificity	Clone	Fluorophore	Manufacturer	Cat. Number
AIM	Live/Dead	NA	Zombie Near IR	BioLegend	423105
AIM	CD3	UCHT1	BV510	BD Biosciences	563109
AIM	CD4	SK3	BB700	BD Biosciences	566392
AIM	CD134	ACT-35	PE	BioLegend	350004
AIM	CD25	M-A251	PE-Cy7	BD Biosciences	557741
AIM	CD8	RPA-T8	BB515	BD Biosciences	564526
AIM	CD137	4B4-1	APC	BioLegend	309810
AIM	CD69	FN50	BV711	BioLegend	310944
AIM	PD-1	EH12.1	BV421	BD Biosciences	562516
AIM	TIM-3	F38-2E2	BV605	BioLegend	345018
AIM	LAG-3	7H2C65	PE/Dazzle594	BioLegend	369218
AIM	Mouse IgG1k (PD-1 isotype)	X40	BV421	BD Biosciences	562438
AIM	Mouse IgG1k (TIM-3 isotype)	MOPC-21	BV605	BioLegend	400162
AIM	Mouse IgG1k (LAG-3 isotype)	MOPC-21	PE/Dazzle594	BioLegend	400176
ICS	Live/Dead	NA	Zombie Aqua	BioLegend	423102
ICS	CD4	RPA-T4	Pacific Blue	BD Biosciences	558116
ICS	CD8	OKT8	AF700	eBioscience	56-0086-82
ICS	IFN-γ	B27	APC	BD Biosciences	554702
ICS	TNF-α	MAb11	PE-Cy7	BD Biosciences	557647
ICS	GM-CSF	REA1215	APCVio770	Miltenyi Biotec	130-123-423
ICS	IL-2	MQ1-17H12	PE	BioLegend	500306
ICS	CD3	UCHT1	BV605	BioLegend	300460
IPa	Live/Dead	NA	Zombie Near IR	BioLegend	423105
IP	TIGIT	A15153G	BV510	BioLegend	372737
IP	CD3	UCHT1	AF700	BD Biosciences	557943
IP	PD-1	MIH4	FITC	Thermo Fisher	11-9969-41
IP	CD4	OKT4	PerCP-Cy5.5	eBioscience	45-0048-42
IP	CD8	RPA-T8	PE-Cy7	BD Biosciences	557750
IP	CD45RA	HI100	BV650	BioLegend	304136
IP	CCR7	3D12	PE-eFluor610	Invitrogen	61-1979-42
IP	CD57	TB01	PE	eBioscience	12-0577-42
IP	CD28	CD28.2	APC	eBioscience	17-0289-42
IP	TIM-3	F38-2E2	BV785	BioLegend	345032
IP	Mouse IgG2ak (TIGIT isotype)	MOPC-173	BV510	BioLegend	400267
IP	Mouse IgG1k (PD-1 isotype)	P3.6.2.8.1	FITC	Thermo Fisher	11-4714-81
IP	Mouse IgG1k (TIM-3 isotype)	MOPC-21	BV785	BioLegend	400169
aIP is the immunophenotyping panel.
